## 11 **Abstract**

12 Neuronal activity generates DNA double-strand breaks (DSBs) at specific loci *in vitro* and this  
13 facilitates the rapid transcriptional induction of early response genes (ERGs). Physiological  
14 neuronal activity, including exposure of mice to learning behaviors, also cause the formation of  
15 DSBs, yet the distribution of these breaks and their relation to brain function remains unclear.  
16 Here, following contextual fear conditioning (CFC) in mice, we profiled the locations of DSBs  
17 genome-wide in the medial prefrontal cortex and hippocampus using  $\gamma$ H2AX ChIP-Seq.  
18 Remarkably, we found that DSB formation is widespread in the brain compared to cultured  
19 primary neurons and they are predominately involved in synaptic processes. We observed  
20 increased DNA breaks at genes induced by CFC in neuronal and non-neuronal nuclei. Activity-  
21 regulated and proteostasis-related transcription factors appear to govern some of these gene  
22 expression changes across cell types. Finally, we find that glia but not neurons have a robust  
23 transcriptional response to glucocorticoids, and many of these genes are sites of DSBs. Our  
24 results indicate that learning behaviors cause widespread DSB formation in the brain that are  
25 associated with experience-driven transcriptional changes across both neuronal and glial cells.

## 26 **Introduction**

27           Neuronal activity has been reported to generate DSBs [2–7]. This was initially observed  
28 in cultured neurons, where a well-known marker of DSBs,  $\gamma$ H2AX (phosphorylation on serine  
29 139 of histone H2A variant X [8]), rapidly increased following glutamate receptor activation [3].  
30 Subsequently, stimulation of the rodent brain was found to generate DSBs following seizures [6]  
31 or behavioral manipulation [2,4]. While wakefulness in zebrafish [5], or wakefulness with  
32 exploration in fruit flies and mice [9], increased DSBs in neurons that were reduced during sleep.

33           One source of genomic stress in the brain is its high transcriptional output; neurons  
34 respond in real-time to environmental changes and this activity necessitates continual modulation  
35 of transcription [1]. We made the unexpected discovery that stimulating the activity of primary  
36 cortical neurons generates DSBs specifically at the rapidly induced early response genes (ERGs),  
37 and this promotes their expression [4]. Increases in  $\gamma$ H2AX at some of these ERGs was later  
38 observed in the brain during fear learning [7] or following memory retrieval [10]. In other  
39 contexts of gene induction, including through transcriptional induction mediated by nuclear  
40 receptors [11–14] or heat shock and serum-stimulation [15], DSBs appear to facilitate gene  
41 induction. Within the complex milieu of the brain, it is therefore likely that different upstream  
42 pathways contribute to the generation of DSBs, yet their locations and their relation to brain  
43 function is an open question. As DSBs pose a threat to genomic integrity [4], understanding the  
44 genome-wide DSB landscape of the brain would facilitate our understanding of how the brain  
45 balances timely transcriptional responses with the generation of DSBs, while revealing sites of  
46 genomic stress that could seed DNA lesions detrimental to neuronal function and contribute to  
47 brain aging and neurodegenerative diseases.

48           We set out to understand the *in vivo* landscape of DSBs in the brain during learning and  
49   how they correspond with gene expression changes occurring in neurons and glia. We find fear  
50   learning paradigm-induced genes are overrepresented amongst those genes with the highest  
51   levels of DSBs in the medial prefrontal cortex and hippocampus. These genes are downstream of  
52   pathways that are shared in part by neurons and non-neurons, and in other cases unique to each  
53   group of cells. Surprisingly, we find potential glia-enriched DSB hotspots at genes that have a  
54   robust transcriptional response to glucocorticoid receptor signaling in glia.

## 55 **Results**

### 56 **Fear learning induces DNA double-strand breaks in the brain**

57  
58 Increases in neuronal activity result in the formation of DSBs both *in vitro* and *in vivo*  
59 [2,4]. However, it was unclear whether DSBs form at specific genomic loci in the brain and in  
60 which cell types in response to a normal physiological event. To elicit neuronal activation in a  
61 physiologically relevant manner, we utilized contextual fear conditioning (CFC), which  
62 generates a strong associative memory between a novel environment and an aversive stimulus, a  
63 foot shock [16]. We assessed neuronal activation in the hippocampus (HIP) and the medial  
64 prefrontal cortex (mPFC) of adult wild-type male C57BL/6J mice, two brain regions known to  
65 be recruited during CFC for subsequent memory formation [16]. Induced expression of ERGs  
66 (e.g., *Npas4*, *Arc*) is known to rapidly follow neuronal activation [4]. Indeed, we found induction  
67 of these genes in both brain regions 30 minutes after CFC, with higher induction in the mPFC  
68 (Fig S1A).

69 Chromatin immunoprecipitation sequencing (ChIP-Seq) for  $\gamma$ H2AX, a chromatin marker  
70 of DSBs [8], is a sensitive method for identifying DSBs genome-wide [4,17–20]. We performed  
71  $\gamma$ H2AX ChIP-Seq 30 minutes following CFC to measure the formation of DSBs. In the naive  
72 hippocampus we observed 136  $\gamma$ H2AX peaks, increasing to 280  $\gamma$ H2AX peaks after CFC, with  
73 125 peaks shared between conditions (S2 Table). In the naive mPFC we observed 120  $\gamma$ H2AX  
74 peaks, increasing to 255  $\gamma$ H2AX peaks after CFC, with 102 peaks shared between conditions (S2  
75 Table). Including all peaks called under the naive and CFC conditions, we found 291  $\gamma$ H2AX  
76 peaks annotated to 323 genes in hippocampus, and 273  $\gamma$ H2AX peaks annotated to 306 genes in  
77 mPFC (Fig 1A; Fig S1B; S2 Table). Consistent with previous studies,  $\gamma$ H2AX peaks were

78 located at gene bodies and proportional to gene length, yet often stretching past the 3'-UTR (Fig  
79 S1C) [4,15,17].

80 **Figure 1. Fear learning induces DNA Double-strand breaks in the brain.**

81 (A) Venn diagram of the  $\gamma$ H2AX peak-containing genes shared between HIP and mPFC for both  
82 naive and CFC conditions. P-value calculated using hypergeometric distribution test. (B) Six  
83 representative top biological processes for the 206  $\gamma$ H2AX peak-containing genes shared  
84 between HIP and mPFC in (A). Over-representation analysis with gene ontology (GO) category  
85 "Biological Process." (C) The top 5 biological processes for the CFC-upregulated genes in  
86 NeuN+ nuclei at each 10- and 30-minute timepoint. Over-representation analysis with gene  
87 ontology (GO) category "Biological Process." (D) Genome browser tracks for the gene *Arc*.  
88 Both HIP and mPFC are shown. Whole tissue  $\gamma$ H2AX ChIP-Seq is shown as LogLR signal  
89 tracks (' $\gamma$ H2AX'). Signal normalized total RNA-Seq from FACS-isolated nuclei is shown for  
90 neurons ('RNA NeuN+') and non-neurons ('RNA NeuN-'). Time points following contextual  
91 fear conditioning are noted; naive, 10, and 30 minutes (0', 10', 30').  $\gamma$ H2AX ChIP-seq tracks are  
92 the combined signal for 3-4 independent replicates, each replicate generated from the pooling of  
93 3 animals. RNA-Seq tracks are the combined signal for 3-4 independent replicates. (E-F)  
94 Heatmaps of the genes containing  $\gamma$ H2AX peaks that sustained transcriptional regulation after  
95 CFC. RNA-Seq heatmap denotes differential genes ('RNA-Seq') and color bar ('Differential  
96 Grouping') denotes cell type specificity. The  $\gamma$ H2AX heatmaps show peaks shared between  
97 tissues ('Shared'), RPKM of  $\gamma$ H2AX signal, Log2FC, and those peaks changing after CFC with  
98  $p_{adj} < 0.05$  ('Differential'). Left is hippocampus (E), Right is mPFC (F).

99  
100       There was a large overlap between  $\gamma$ H2AX peaks called in both hippocampus and mPFC,  
101 reflecting their shared recruitment during learning (Fig 1A). We utilized clusterProfiler [21] to  
102 perform gene ontology (GO) analysis of these 206  $\gamma$ H2AX peak-containing genes and clustering  
103 of the top biological processes yielded four unique categories (Fig S1D). The largest cluster  
104 contained those GOs related to synaptic function (e.g., 'modulation of chemical synaptic  
105 transmission') that included glutamate receptors *Gria2* and *Grin2b*, synaptic plasticity regulators  
106 like *Camk2a* [22], and ERGs like *Arc* [23] and *Plk2* [24] (Fig 1B). Similar to a previous report in  
107 the immune setting, many of these genes are lineage-specific, like the transcription factor  
108 *Neurod2* [17]. Two clusters composed of single GO terms were observed, one enriched for RNA  
109 binding genes ('Regulation of mRNA splicing, via spliceosome') and one enriched for  
110 cytoskeleton-related genes ('protein depolymerization') (Fig 1B). Finally, the fourth unique

111 cluster was related to hormone or biological rhythms (e.g., ‘response to hormone’) (Fig 1B). To  
112 confirm  $\gamma$ H2AX peaks at ERGs, we performed  $\gamma$ H2AX ChIP-qPCR on pooled hippocampi  
113 collected 30 minutes following CFC. Compared to the naive condition, hippocampi of CFC mice  
114 had significant increases in  $\gamma$ H2AX at the gene bodies of the ERGs *Npas4* and *Nr4a1*, but not at  
115 the housekeeping gene *B2m* (Fig S1E). These findings indicate that many genes essential for  
116 neuronal function and memory formation, and significantly more of them than expected based on  
117 previous observations in cultured neurons following NMDA stimulation, are potentially hotspots  
118 of DSB formation. As DSBs represent a grave threat to genomic integrity [25], with its sequela  
119 including transcriptional dysregulation and genomic rearrangements, this suggests that genes  
120 critical for neuronal function are uniquely vulnerable to DNA damage.

121 We previously observed that the formation of DSBs correlated with rapid gene induction  
122 in neurons, particularly the ERGs which we find are sites of DSBs in the brain. To understand  
123 how these DSBs correlate with CFC-induced gene expression changes, we performed nuclear  
124 RNA-Seq. While whole-cell mRNA levels reflect both RNA synthesis and RNA degradation,  
125 assaying nuclear RNA levels more directly measures transcriptional activity. We fixed and  
126 enriched for neuronal and non-neuronal nuclei collected 10 and 30 minutes after CFC through  
127 fluorescence-activated cell sorting (FACS), using the pan-neuronal nuclei marker NeuN [26]  
128 (Fig S2A). Nuclei were decrosslinked after sorting and total RNA was isolated for downstream  
129 analysis. Utilizing an intronic primer, we found higher transcriptional induction of the neuron-  
130 specific ERG *Npas4* [27] in the FACS-isolated neuronal (NeuN+) nuclear RNA than whole  
131 mPFC lysate, with minimal expression in the non-neuronal (NeuN-) fraction, indicating  
132 successful purification of neurons and non-neurons (Fig S2B). Assaying mRNA of the canonical  
133 ERG *Arc* showed induction in both neuronal and non-neuronal nuclei following CFC (Fig S2B).

134 Because the peak of ERG induction occurred as early as 10 minutes or as late as 30 minutes after  
135 CFC, we included both time points in our sequencing analyses (Fig S2B).

136 We next performed nuclear RNA-seq of sorted neurons and non-neurons 10 and 30  
137 minutes subsequent to CFC. First, successful isolation of neuronal nuclei was validated by  
138 examining aggregate expression of known cell type-enriched genes [28], finding that pyramidal-  
139 and interneuron-enriched genes were highly correlated with the NeuN+ RNA-Seq, while genes  
140 enriched in glia, including astrocytes, microglia, and oligodendrocytes, along with other non-  
141 neuronal cells were strongly enriched in the NeuN- RNA-Seq (Fig S3A). We identified hundreds  
142 of upregulated genes, indicating that fear learning activates the transcriptomes of neurons and  
143 non-neurons across brain regions within minutes (Fig S3B-S3E; S3 Table). The mPFC had the  
144 highest number of upregulated genes, suggesting a stronger transcriptional response in this area  
145 during learning (Fig S3F). In agreement with our  $\gamma$ H2AX ChIP-seq analysis, there was a large  
146 overlap between HIP and mPFC upregulated genes in neurons (202 genes at 10 minutes and 448  
147 genes at 30 minutes) (Fig S3F). Non-neuronal nuclei also exhibited considerable transcriptional  
148 changes in response to CFC, but with more comparable numbers of upregulated genes between  
149 brain areas and with a large overlap occurring at 30 minutes (34 genes at 10 minutes and 242  
150 genes at 30 minutes) (Fig S3G). Further, we found biological processes related to synaptic  
151 structure and function were amongst the most enriched GO categories in the upregulated genes  
152 of neurons – mirroring our  $\gamma$ H2AX ChIP-Seq (Fig 1C). In contrast, neuronal downregulated  
153 genes had minimal enrichment for biological processes (a single significantly enriched term:  
154 “cell-cell adhesion via plasma-membrane adhesion molecules”; adjusted p-value =  $2.4 \times 10^{-3}$ ).

155 To assess the relationships between activity-induced DSBs and gene expression in the  
156 brain, we compared the ChIP-seq and RNA-seq data. First, examining a specific genomic locus



157 of the ERG Arc revealed increases in  $\gamma$ H2AX signal with concomitant upregulation in both  
158 neurons and non-neurons (Fig 1D). Globally, we find four categories of  $\gamma$ H2AX-associated genes  
159 whose expression was altered after CFC: those upregulated exclusively in neurons (56 HIP and  
160 114 mPFC), genes upregulated in both neurons and non-neurons (12 HIP and 28 mPFC), genes  
161 upregulated specifically in non-neurons (19 HIP and 12 mPFC), and a small subset of  
162 downregulated genes (16 HIP and 15 mPFC) (categories denoted by “Differential Grouping”  
163 row) (Fig 1E and 1F). Overall, we find transcriptional changes are more strongly associated with  
164  $\gamma$ H2AX in the brain than anticipated. Previously, we observed twenty gene-associated  $\gamma$ H2AX  
165 loci following stimulation of cultured neurons [4], while in the HIP and mPFC we see more than  
166 100-150 gene-associated  $\gamma$ H2AX loci that are transcriptionally induced (Fig 1E and 1F).

## 167 **Activity-dependent genes are a source of DNA breaks in the brain**

168 We next sought to understand the overlap between CFC-upregulated genes and  $\gamma$ H2AX  
169 peaks. Overall, we found that  $\gamma$ H2AX peaks were over-represented with genes upregulated by  
170 fear learning, particularly in the mPFC where we saw higher induction of gene expression (Fig  
171 2A and Fig S4A). However, absolute transcription level is known to correlate with DSBs in both  
172 human and mouse cells [29–31]. By binning all expressed genes at the CFC30’ time point in the  
173 mPFC by expression level, we observed that genes with higher RNA expression had higher  
174  $\gamma$ H2AX levels in the gene body (Fig S4B). This potentially explains some of the ~55% of the  
175  $\gamma$ H2AX-associated genes in the mPFC and ~80% in the HIP that are non-responsive to CFC (Fig  
176 2A).

### 177 **Figure 2: Activity-dependent genes are a source of DNA breaks in the brain**

178 (A) Percent overlap between genes containing a  $\gamma$ H2AX peak and those that were upregulated  
179 ( $p_{adj} < 0.05$ ) in neuronal nuclei after CFC. Hypergeometric distribution test; \*\*\*\*  $P < 0.0001$ .  
180 (B-C) Permutation testing to assess whether CFC-upregulated genes at 10 minutes (B) or 30  
181 minutes (C) have greater than expected  $\gamma$ H2AX intensity, accounting for RNA expression level  
182 at the same time point (CFC30’). Distributions show the mean  $\gamma$ H2AX intensity (RPKM) for

183 1000 permutations of random sampling, binned by RNA expression level (FPKM). Lines are the  
184 mean  $\gamma$ H2AX RPKM of either all permutations ('Expected'), or genes upregulated at the  
185 specified time point ('Observed'). (D) Top 8 enriched promoter motifs for the genes upregulated  
186 in neuronal nuclei from mPFC 30 minutes after CFC ( $\text{Log}_2\text{FC} > 0$  &  $\text{FDR} < 0.05$ ). Using the  
187 "Transcription Factor Targets" (TFT) gene set from the molecular signatures database  
188 (MSigDB). (E) Select activity-associated motifs at the promoters of 48 upregulated genes with  
189 DSBs. Left, number of the specified motifs associated with each gene's promoter. Center,  
190  $\gamma$ H2AX  $\text{Log}_2\text{FC}$ , right, fold change observed after CFC in mPFC NeuN+ nuclei. Using the TFT  
191 gene sets from MSigDB for each transcription factor motif.  
192

193 We next asked whether upregulated genes have higher amounts of  $\gamma$ H2AX than can be  
194 explained simply by their transcription level alone. Using permutation testing, we binned  
195 neuronal upregulated genes by RNA expression level, and these bins were then used for random  
196 sampling without replacement from all expressed genes. We found upregulated genes have  
197 higher  $\gamma$ H2AX intensity than would be expected by their transcriptional level (Fig 2B and 2C  
198 and Fig S4C). Further, the more rapid the induction (CFC 10 minutes) the greater the  
199 discrepancy between the observed and the expected  $\gamma$ H2AX level (Fig 2B and 2C). Thus, while  
200 many of the observed sites of DSBs may reflect high expression levels, as exemplified by non-  
201 induced highly expressed housekeeping genes like histone genes or neuronal lineage genes (S2  
202 Table), gene induction also appears to correlate with increased  $\gamma$ H2AX.

203 To understand what pathways were mediating the rapid induction of gene expression  
204 following CFC in neurons, we searched for transcription factor motif overrepresentation at the  
205 promoters of differentially expressed genes, using the Molecular Signatures Database (MSigDB)  
206 [32]. Motifs from CREB/ATF family members, EGR family members, as well as SRF, were all  
207 enriched (Fig 2D and Fig S5A-S5C). These transcription factors are known to act downstream of  
208 cellular activation and calcium influx, including through MAPK signaling [23]. Examining all  
209 upregulated genes associated with CREB/ATF, EGR, and SRF motifs for the presence of  
210  $\gamma$ H2AX enrichment yields 48 genes in mPFC and 20 genes in HIP (Fig 2F and Fig S5D).

211 Importantly, a number of these activity regulated genes, such as *Npas4*, *Fos*, *Nr4a1*, *Actb*, *Ntrk2*,  
212 and *Egr1* are known to be targets of these transcription factors, and are essential for efficient  
213 memory formation after CFC [13,33–37]. Other genes that fit the same category, including *Arc*  
214 and *1700016P03Rik* (mir212/mir132) were not included because their regulatory motifs are not  
215 in the close vicinity of the TSS [38–40].

216 Having established a connection between rapid gene induction and  $\gamma$ H2AX foci in the  
217 brain, we next wanted to understand if any of our DSBs are likely to correspond to late response  
218 genes, the second wave of genes induced following stimulation [41]. We compared the  
219 observations in the mPFC to a published single-cell RNA-Seq dataset which measured cell-type-  
220 specific induction of early-response genes (n=350) and late-response genes (n=251) after light  
221 stimulation of the visual cortex [42]. We found that the rapidly induced early-response genes are  
222 enriched with our mPFC DSB-labeled genes (Fig S6), with *Tuba1a* the only  $\gamma$ H2AX site that is  
223 exclusively upregulated at the late-response time point (Fig S6). This suggests that we are not  
224 missing DSBs that occurred at late response genes and recapitulates our nuclear RNA-Seq  
225 findings with single cell mRNA. Altogether, these results indicate that DSB formation is more  
226 widespread in the brain than previously documented and is associated with an important subset  
227 of transcriptionally upregulated genes following CFC.

## 228 **Fear learning induces a proteostasis response in neurons and non-** 229 **neurons**

230 We observed a number of  $\gamma$ H2AX-associated genes whose expression was altered after  
231 CFC in both neurons and non-neurons (Fig 1E). These included early genes (e.g., *Arc*, *Egr1*) and  
232 chaperones (e.g., *Hsp90ab1*, *Hspa8*). We had also observed the heat shock transcription factor  
233 HSF1, which induces genes in response to protein folding stress [43], enriched in the promoters  
234 of neuronal upregulated genes in both HIP and mPFC (Fig 2D and S5A and S5C). Transcription

235 factor motif analysis of the promoters of genes upregulated in non-neuronal nuclei 30 minutes  
236 after CFC yielded both HSF1 and the activity-regulated transcription factor CREB, as in neurons  
237 (Fig 3A). Indeed, a number of the CFC-induced genes in non-neuronal nuclei appear to be  
238 activity-regulated (Fig S7A). Activation of astrocytes during learning is known to be important  
239 for memory formation [44], and these rapid transcriptional responses mediated by activity-  
240 regulated transcription factors may reflect an important role of glia in the response to fear  
241 learning. We next examined clustering of the top GO terms from these non-neuronal genes and  
242 found biological processes related to protein folding, hormone response, metabolism, and  
243 signaling (Fig 3B and Fig S7B and S7C). This indicates that CFC elicits a protein folding  
244 response and cellular activity-regulated response which is shared by multiple cell types.  
245 Inspecting signal tracks for the HSP70 family member *Hspa8* highlighted this relationship,  
246 showing the presence of an inducible  $\gamma$ H2AX peak (Fig S1B) and increased RNA expression  
247 after CFC in both neurons and non-neurons (Fig 3C). Confirming increased HSF1 activity  
248 following CFC, we found increased nuclear HSF1 in neurons and non-neurons following CFC,  
249 and increased binding of HSF1 to the promoters of *Hsp90ab1* and *Hspa8* (Fig S8A and S8B).

250 **Fig 3: Fear learning induces a proteostasis response in neurons and non-neurons.**  
251 (A) Top 5 enriched promoter motifs at the genes upregulated in HIP NeuN- nuclei (top) and  
252 mPFC NeuN- nuclei (bottom) 30 minutes after CFC. Using the TFT gene sets from MSigDB for  
253 each transcription factor motif. (B) Ten representative top enriched biological processes for non-  
254 neuronal nuclei 30 minutes after CFC. Enrichment for the 426 upregulated genes in HIP and 511  
255 upregulated genes in mPFC. Over-representation analysis with GO category “Biological  
256 Process.” (C) Genome browser tracks for the chaperone *Hspa8*.

257  
258 In HIP and mPFC we found multiple genes with  $\gamma$ H2AX peaks that were induced after  
259 CFC and which are potential HSF1 targets because of promoter HSF1 binding following heat  
260 shock in mouse embryonic fibroblasts [45] (HIP: *Hspa8*, *Baiap2*, *Sh3gl1*, *Dnaja1*, *Hsp90ab1*,  
261 *Dynll1*, *Mbp*, *Ywhah*, *Dnajb5*, *Ddit4*, *Prkag2*, *Gsel*, *Ptk2b*, *Arpc2*, *Ywhag*; mPFC: *Tcf4*, *Hspa8*,

262 *Baiap2, Hsp90ab1, Hnrnpa2b1, Gfod1, Lncpint, Ywhah, Dnajb5, Ddit4, Ywhag*). We also  
263 identified ATF6, which functions as part of the unfolded protein response (UPR) and facilitates  
264 protein quality control in the endoplasmic reticulum [46], as a potential regulator of additional  
265 genes. Known ATF6 targets such as *Hspa5* (Grp78) [47], *Calr* [47], *Xbp1* [48], and others  
266 (*Ywhaz, Atp2b1*) [49], were enriched with  $\gamma$ H2AX peaks and upregulated in neurons and to a  
267 lesser degree non-neurons. These findings indicate that CFC generates a rapid proteostasis  
268 response in both neurons and non-neurons, with induced genes constituting sites of DNA breaks.

## 269 **Glucocorticoid-regulated genes are sites of DNA double-strand** 270 **breaks**

271  
272 'Response to hormone' was one of the top enriched biological processes observed  
273 amongst the CFC-induced genes in non-neuronal nuclei (Fig 3B) as well as the  $\gamma$ H2AX peaks  
274 (Fig 1B). Examining these genes further, we found examples such as *Sgk1* and *Ddit4* which are  
275 known to be regulated by the glucocorticoid receptor (GR) [50,51] and while not upregulated in  
276 neuronal nuclei, were upregulated at the mRNA level in whole HIP and mPFC lysate (Fig 4A  
277 and Fig S9A). Unlike neuronal activity, which occurs immediately upon exposure to  
278 environmental changes, the hormonal response to stress is delayed while the signal is relayed  
279 through the hypothalamic-pituitary-adrenal axis, before eliciting glucocorticoid release into the  
280 blood stream. Glucocorticoids increase in the blood within 30 minutes following exposure to a  
281 stressor [52], corresponding with increases in the intrahippocampal corticosterone concentration  
282 [53] and nuclear localization of the GR in the mouse brain [52]. We observed that 30 minutes  
283 was the time point where non-neuronal CFC-upregulated genes were most likely associated with  
284 a  $\gamma$ H2AX peak (Fig 4A). Furthermore, compared to other brain areas, the mPFC and HIP have  
285 some of the highest expression of GR [54], suggesting they are key targets of the stress response.  
286 To identify putative GR-regulated genes, we utilized two ChIP-Seq datasets of GR binding in rat

287 cortex to map all binding sites containing the glucocorticoid-responsive element (GRE) in the  
288 mouse genome to the nearest gene (S4 Table) [55,56]. Interestingly, we found that many of the  
289  $\gamma$ H2AX-containing genes that were responsive to CFC only in non-neuronal nuclei are  
290 coincident with genes annotated to a GR-binding site (Fig 4A).

291 **Fig 4: Glucocorticoid-regulated genes are sites of DNA double-strand breaks.**

292 (A) Heatmap of  $\gamma$ H2AX peaks occurring at genes upregulated specifically in non-neuronal  
293 nuclei. Top, number of glucocorticoid receptor binding sites annotated per gene (rat cortical  
294 ChIP-Seq) [55,56].  $\gamma$ H2AX Log<sub>2</sub>FC and upregulated genes for HIP and mPFC after CFC. (B)  
295 RT-qPCR analysis of mRNA induction in mouse glial primary cultures 2 hours after treatment  
296 with glucocorticoid receptor agonist dexamethasone (100nM). N = 4 independent cultures; two-  
297 tailed unpaired student's t-test ; \*\*P  $\leq$  0.01; \*\*\* P  $\leq$  0.001; \*\*\*\* P  $<$  0.0001; Mean  $\pm$  SEM. (C)  
298 ChIP-qPCR analysis of  $\gamma$ H2AX induction at select gene bodies in mouse glial primary cultures  
299 30 minutes after treatment with dexamethasone (Dex) (100nM). N = 4 independent cultures;  
300 two-tailed unpaired student's t-test ; \*\*P  $\leq$  0.01; \*\*\* P  $\leq$  0.001; \*\*\*\* P  $<$  0.0001; Mean  $\pm$  SEM.  
301 (D) Genome browser snapshot of the gene *Ddit4*. Top, glucocorticoid receptor binding sites  
302 ('GC Peak'; rat cortical ChIP-Seq) [55,56], hippocampal region CA1 H3K27ac ChIP-Seq from  
303 NeuN+ or NeuN- isolated nuclei 1 Hour after CFC ('K27Ac') [57],  $\gamma$ H2AX LogLR signal tracks,  
304 and nuclear RNA-Seq. (E) Average H3K27ac signal at glucocorticoid receptor binding sites (rat  
305 cortical ChIP-Seq) [55,56] containing the GC motif in mouse (n= 5591 peaks). H3K27ac ChIP-  
306 Seq of mouse hippocampal CA1 region from NeuN+ or NeuN- isolated nuclei 1 hour after  
307 exposure to context, or CFC ('shock') [57]. Colored bars represent the apex of each condition.  
308

309 We tested whether a subset of these genes can be induced by the GR-specific agonist  
310 dexamethasone in cultured primary glia. In contrast to *Actb* which is not a known target of GR,  
311 we found dexamethasone induced the expression of *Ddit4*, *Sgk1*, and *Glul*, genes that were  
312 specifically upregulated in non-neuronal nuclei during CFC and annotated to a GR-binding site  
313 (Fig 4B). Thus, our findings implicated the GR in mediating gene induction in glia after fear  
314 learning. Next, to assess whether GR activity is sufficient to increase DSBs at these genes, we  
315 treated cultured primary glia with dexamethasone and measured  $\gamma$ H2AX enrichment by ChIP-  
316 qPCR. The genes *Ddit4*, *Glul*, and *Sgk1*, alongside the canonical GR-inducible gene *Mt1* [58],  
317 showed significant increases in  $\gamma$ H2AX enrichment (Fig 4C). *Arc*, with similarly high  $\gamma$ H2AX

318 levels following CFC, alongside the housekeeping gene *B2m*, did not exhibit  $\gamma$ H2AX enrichment  
319 in response to dexamethasone (Fig S9B).

320 Our RNA-seq data from sorted nuclei showed upregulation of the  $\gamma$ H2AX-associated  
321 gene *Ddit4* only in non-neuronal nuclei following CFC, a similar pattern for many of our other  
322 putative and confirmed GR-regulated genes (Fig 4D). To understand whether non-neurons had  
323 more active GR-bound enhancers, we utilized a ChIP-Seq dataset of histone 3 lysine 27  
324 acetylation (H3K27Ac), a chromatin mark of enhancer and promoter activity, from purified  
325 neuronal and non-neuronal nuclei [57]. Glia have higher H3K27Ac signal at the GR-bound  
326 enhancers surrounding *Ddit4*, indicating that GR-regulated enhancers are more active in non-  
327 neuronal nuclei than neurons (Fig 4D). To examine this phenomenon genome-wide, we looked at  
328 aggregate H3K27Ac signal in neurons and non-neurons at all GR-binding sites (S4 Table)  
329 [55,56]. Strikingly, both the anterior cingulate cortex (ACC) of the medial prefrontal cortex, and  
330 the hippocampal area Cornu Ammonis 1 (CA1) showed higher baseline acetylation around GR  
331 peaks in non-neurons vs. neurons ('Naive') (Fig 4E and Fig S9C). We then examined H3K27Ac  
332 signal in CA1 under additional experimental conditions including 'context' (exposure to the  
333 context without a foot shock) and 'shock' (context paired with a foot shock). We found that  
334 H3K27Ac signal at GC peaks in the neuronal fraction increased similarly after exposure to either  
335 context or shock, suggesting a generalized enhancer activation in response to exploratory  
336 behavior that may be independent of stress. In contrast, the non-neuronal fraction showed  
337 increases in H3K27Ac after shock, demonstrating that these enhancers are responsive to the  
338 stressful condition in non-neurons but not in neurons (Fig 4E; Fig S9D, intergenic peaks).

339 Our findings identified a group of CFC-responsive non-neuronal genes that are likely  
340 regulated by GR signaling (Fig 4A-4E). We checked gene expression of the GR gene, *Nr3c1*,

341 finding that neurons express *Nr3c1* at approximately half the level of non-neurons (Fig S9E).  
342 The differing GR expression levels could be one of the reasons why these same genes did not  
343 exhibit induction or increased enhancer activity in neurons (Fig 4A). Therefore, we verified  
344 whether GR nuclear translocation occurs in response to receptor agonism in both cell types. We  
345 measured GR nuclear intensity in mouse brain after treatment with corticosterone, the  
346 predominant glucocorticoid in rodents [59]. We found increases in nuclear GR in both neurons  
347 and non-neurons (though there was a trend, it was not significant in the NeuN- fraction) (Fig  
348 S9F). Thus, the absence of a neuronal stress-mediated change in enhancer activity is likely due to  
349 decreased chromatin accessibility at the enhancer level [60], highlighting that glia may play a  
350 significant role in the homeostatic response to stress. Nevertheless, it is unclear whether neurons  
351 are capable of mounting a transcriptional response to stress hormone, and whether induction of  
352 hormone-responsive genes in neurons would be accompanied by DSBs.

### 353 **Glia but not neurons have a robust transcriptional response to** 354 **corticosterone**

355  
356 To test whether an endogenous GR agonist was sufficient to upregulate some of the glial  
357 genes displaying elevated levels of  $\gamma$ H2AX and transcription following CFC, we injected mice  
358 with corticosterone at a dose known to approximate a stressful experience [61], and collected the  
359 hippocampus 30 minutes later. We FACS-sorted nuclei into four cell populations: neuronal  
360 (NeuN+), astrocytic (GFAP+), microglial (PU.1+), and oligodendrocyte-enriched (NeuN-,  
361 GFAP-, PU.1-; 3X-), and subjected them to RNA extraction (Fig S10A). RT-qPCR analysis  
362 showed enrichment for respective cell type markers, indicating successful isolation of cell types  
363 (Fig S10B). We then assessed gene expression changes in *Sgkl* and *Glul* that have CFC-  
364 inducible  $\gamma$ H2AX peaks (Fig S2A), and found that except for neurons, all three glial subtypes



365 could respond to an endogenous GR agonist (Fig S10C ). While GR agonists are sufficient to  
366 induce the putative glucocorticoid-regulated genes seen after CFC both *in vitro* (dexamethasone;  
367 Fig 4B) and *in vivo* (corticosterone; Fig S10C), we sought to determine whether these genes are  
368 dependent on the GR for CFC-induced changes in expression. We found that whereas  
369 pretreatment with a glucocorticoid receptor antagonist RU-486 (mifepristone) [62] blocked CFC-  
370 induced transcription of *Sgk1*, *Ddit4*, and *Glul* in whole hippocampal lysates, it did not alter  
371 transcription of the housekeeping gene *Gapdh*, or induction of the ERG *Arc* (Fig 5A).

372 **Fig 5: Glia, not neurons, have a robust transcriptional response to corticosterone.**

373 (A) Pretreatment with glucocorticoid receptor antagonist RU-486 (Mifepristone) blocks CFC-  
374 induced gene expression in hippocampus. Pretreatment with vehicle (1% v/v Tween 80 in saline)  
375 or 50 mg/kg RU-486 IP occurred 30 minutes prior to CFC. qRT-PCR analysis of pre-mRNA  
376 with intronic primer and normalized to *Hprt*. cDNA was primed with random hexamers. N = 5  
377 mice per group; one-way ANOVA with Tukey's multiple comparisons test. (B) Number of  
378 corticosterone upregulated and downregulated genes from RNA-Seq of FACS-isolated nuclei  
379 from hippocampal cell types 30 minutes after saline or corticosterone:HBC complex (2mg/Kg)  
380 treatment. Cutoff  $p_{adj} < 0.05$ . (C) Twenty-one representative top enriched biological processes  
381 for the upregulated genes in purified hippocampal nuclei from astrocytes, microglia, and  
382 oligodendrocyte-enriched after corticosterone treatment (276, 453, and 551 genes respectively;  
383  $p_{adj} < 0.05$ ). Summary categories representing each grouped list of GOs is listed on the right. No  
384 enrichment of processes at threshold  $p_{adj} < 0.05$  with the 112 upregulated genes in neuronal  
385 nuclei. Over-representation analysis with gene ontology (GO) category "Biological Process."  
386 (D) Heatmap of 43  $\gamma$ H2AX peaks at genes upregulated in FACS-isolated neurons and glia  
387 following corticosterone treatment. From top: number of glucocorticoid receptor (GC) binding  
388 sites annotated per gene (rat cortical ChIP-Seq) [55,56],  $\gamma$ H2AX Log<sub>2</sub>FC in HIP after CFC,  
389 corticosterone-induced genes in NeuN+, GFAP+, PU.1+, and oligodendrocyte-enriched (3X-;  
390 NeuN-GFAP-PU.1-) hippocampal nuclear RNA-Seq 30 minutes after corticosterone treatment,  
391 and HIP RNA-Seq after CFC.

392  
393 We next performed RNA-Seq from hippocampal cell types after corticosterone treatment  
394 to better understand how the transcriptomes of the four major brain cell types respond to GR-  
395 mediated transcriptional regulation. Successful isolation of brain cell types was validated by  
396 examining aggregate expression of known cell type-enriched genes [28] (Fig S11A). Neurons  
397 have a modest transcriptional response following corticosterone treatment (112 genes; Fig 5B  
398 and Fig S11B; S3 Table). In contrast, astrocytes, oligodendrocyte-enriched, and microglia have

399 hundreds of upregulated genes (276, 453, and 551 respectively; Fig 5B and Fig S11C-S11E; S3  
400 Table). Our results are consistent with published *in vitro* findings that reported extensive  
401 response to dexamethasone in cultured astrocytes but little in cultured neurons [63]. The ability  
402 of glia to mount a robust transcriptional response to glucocorticoids suggests that glia may have  
403 a much larger role to play in the response to stress and its impact on the brain during learning  
404 than previously appreciated.

405 Clustering of the top GO terms from the genes upregulated following corticosterone  
406 treatment shows major categories of biological processes pertaining to proliferation, cell death,  
407 cellular motility, homeostasis, signaling, inflammation, other various cellular functions, and as  
408 would be expected, a glucocorticoid response (Fig 5C; Fig S12A-S12C). No enriched terms were  
409 observed within the neuronal upregulated genes. Downregulated genes were enriched for  
410 biological processes related to cell motility, inflammation, differentiation and proliferation (Fig  
411 S13A-S13D). Glial function is known to be affected by cellular activity and motility, with  
412 morphological changes reflecting changes in cellular function [64–66]. Together, these large  
413 changes in the transcriptomes of the three glial cell types is likely to impact their functions and  
414 could affect the formation of memory.

415 We next sought to understand how well GR-mediated gene induction could explain the  
416 glia-specific DSBs seen *in vivo*, and whether genes regulated through this pathway in neurons  
417 incur DSBs. Examining all  $\gamma$ H2AX-containing genes that were also upregulated in one of the  
418 cell types after corticosterone, we found that the vast majority (32/43; 74%) are regulated only in  
419 glia (Fig 5D). Thus, we have identified a glial-enriched pathway that may be incurring DSBs  
420 during CFC. Collectively, these results show that genes responsive to stress hormone are

421 predominantly glial, with some of these genes showing high levels of the DSB marker  $\gamma$ H2AX  
422 and likely modulating important glial functions.

## 423 **Discussion**

424  
425           There is increasing evidence for an association between neuronal activity and the  
426 generation of DSBs, but their *in vivo* location and relation to brain function is unknown [2–  
427 4,6,7]. Here, using  $\gamma$ H2AX as a proxy for DSBs, we identify hundreds of gene-associated DSBs  
428 in the medial prefrontal cortex and hippocampus that are important for learning and memory  
429 [16]. The surprisingly high number of genes with DSBs expands upon the small number  
430 previously observed in neurons following NMDA stimulation *in vitro* [4].

431           We observed that gene induction exhibits higher  $\gamma$ H2AX than expected based on gene  
432 expression level, and disparate classes of  $\gamma$ H2AX peaks, such as lincRNAs (*Lncpint*, *Mir9-3hg*,  
433 *Mir9-1hg*, *1700016P03Rik*[*mir212/mir132*]), housekeeping genes (*Hsp90ab1*, *Actb*), and as seen  
434 previously, lineage-specific genes [17], particularly those related to neuronal function (*Grin2b*,  
435 *Camk2a*, *Cck*, *Mbp*), are all regulated by CFC. However, though there is a clear correspondence  
436 between  $\gamma$ H2AX peaks and CFC-induced genes, we do see less significant changes in  $\gamma$ H2AX  
437 enrichment at many of these genes, with most of the peaks already present in the naive condition.  
438 In our previous study, significant  $\gamma$ H2AX peaks become evident only after inducing neuronal  
439 activity in cultured neurons [4], suggesting that the presence of DSBs in the naive condition at  
440 known activity-induced genes may partially reflect basal neuronal activation occurring in the  
441 brain.

442           As most brain cells are postmitotic, they rely on non-homologous end joining (NHEJ) for  
443 DNA double-strand break (DSB) repair [25]. NHEJ can be error free, however, the presence of  
444 blocked DNA ends promotes end resection, which can result in sequence loss, rearrangements, or  
445 translocations [67]. The accumulation of irreversible sequence damage with time has the  
446 potential to perturb brain function during aging and disease [1], and efficient DNA repair

447 pathways are thought to be critical to prevent functional decline during brain aging and  
448 neurodegeneration [25,68]. ERGs and heat shock genes, two classes of DSB hotspots that were  
449 induced following CFC in neurons and non-neurons, were found in the aged pancreas to be sites  
450 of transcriptional noise and this correlated with the presence of somatic mutations [69]. It is  
451 interesting to speculate whether the same process also occurs in the brain with age and whether it  
452 may compromise the brain's ability to respond to cellular insults occurring during aging or in  
453 neurodegeneration, where protein folding factors are upregulated during disease progression  
454 [70]. Whether their overexpression contributes to the accumulation of DNA breaks observed  
455 during the progression of neurodegenerative disease is unclear [71,72]. Overall, we have  
456 identified sites of DSBs at genes important for neuronal and glial functions, suggesting that  
457 impaired DNA repair of these recurrent DNA breaks which are generated as part of brain activity  
458 could result in genomic instability that contribute to aging and disease in the brain [1,25].

459         Convergent transcription that leads to polymerase collision is known to generate DSBs  
460 [17,73]. We observed a few instances in which small  $\gamma$ H2AX peaks are found near sites of  
461 antisense transcription. For example, a small  $\gamma$ H2AX peak is present within intron 1 of *Polr3e*, a  
462 known site of transcriptional interference between RNA polymerase II (Pol II) and antisense  
463 transcription mediated by RNA polymerase III (Pol III) (Figure S14) [74]. Other examples  
464 include a small peak at *29000060B14Rik* that is within and antisense to *Clasp1*, the promoter of  
465 *Pcif1*, or other peaks which overlap the 3' UTRs of closely spaced genes (e.g., *Prrc2a/Bag6*,  
466 *Dbn1/Prr7*).

467         We found that glia are likely to play an underappreciated role in the response to stress in  
468 the nervous system and this corresponds with DSBs, a relation between stress hormones and  
469 DNA damage that was also observed in mouse fibroblasts [75]. Our results are reminiscent of

470 observations in the nucleus accumbens after morphine treatment, where oligodendrocytes in  
471 particular were found to induce a number of genes targeted by the GR [76]. Why neurons exhibit  
472 such limited responses to corticosterone remains uncertain. However, given our observation that  
473 GR-bound enhancers are more active in glia, and that GR nuclear intensity increased in neurons  
474 after corticosterone treatment, it is likely that chromatin accessibility plays a key role  
475 determining the GR response, as reported previously [60]. This indicates a predominately  
476 epigenetic mechanism underpinning the modest transcriptional response that neurons exhibit to  
477 corticosterone.

478         We find that stress likely impacts the physiology of glia through modulation of their  
479 transcriptomes, impacting numerous cellular processes. These changes may explain how stress  
480 has been shown to impact glial morphology and function, including after CFC [50,77–85]. The  
481 role of glucocorticoids during the brain’s response to stress could therefore be partially separated  
482 into a predominantly non-transcriptional role in neurons, wherein the GR has an important  
483 transcription-independent function at the synapse that aids memory formation [59,86]. In  
484 contrast, the homeostatic response to stress may run primarily through glia, consistent with the  
485 general role of glia in brain homeostasis. Beyond homeostasis, astrocytic GR expression was  
486 found to be necessary for CFC-induced memory formation [85], and future work will be required  
487 to better understand how glia facilitate or hinder learning through their GR response.

488         Our observations suggest that the glial contribution to the deleterious effects of stress  
489 hormones may be stronger than previously appreciated. This may include cases of steroid  
490 dementia, wherein cognitive alterations occur in response to high levels of glucocorticoids (e.g.,  
491 Cushing’s syndrome), as well as disorders characterized by anxiety and depression [87,88].  
492 Interestingly, the microglial gene expression signature seen after corticosterone treatment was

493 enriched for disease associations such as inflammation and depression (Fig S15). This fits with  
494 the observation that stress can potentiate the microglial inflammatory responses [89–91], and  
495 their implication in the etiology of depression [92]. Because we found that glial GR-bound  
496 enhancers are more active in responding to stress than those in neurons, we posit that  
497 susceptibility to stress may include an underappreciated genetic component comprised of glia-  
498 specific variants. This also implicates glia, particularly microglia, in the genetics of the many  
499 psychiatric and neurodegenerative disorders for which stress is a risk factor [93–96], including  
500 Alzheimer’s disease [97,98] and schizophrenia [99].

## 501 **Materials and Methods**

502

### 503 **Ethics statement**

504 All mouse work was approved by the Committee for Animal Care of the Division of  
505 Comparative Medicine at Massachusetts Institute of Technology (protocol number 0618-044-  
506 21).

507

### 508 **Contextual Fear Conditioning Paradigm, Treatments, and Tissue Collection**

509 4-month-old C57BL6/J male mice were purchased from Jackson Laboratory (stock number  
510 000664). Mice were group housed with a 12-hour light and dark cycle with access to food and  
511 water ad libitum. To minimize variability, mice were single housed for one week before  
512 experimental manipulation.

513

514 For contextual fear conditioning, mice were habituated in the context for 3 minutes prior to  
515 administration of 30 second-spaced dual 0.8 mA foot shocks applied by the grid floor. The  
516 animals remained in the chamber for an additional minute and were placed back in their home-  
517 cage. Ten or thirty minutes after placement in the context, mice were euthanized. For  
518 Mifepristone (Sigma-Aldrich) pretreatment, mifepristone was dissolved in 1% v/v Tween 80 in  
519 saline. Mice were treated IP with either 50mg/Kg mifepristone or vehicle immediately before  
520 contextual fear conditioning, followed by euthanasia 30 minutes later. For corticosterone  
521 treatment, corticosterone:HBC complex (Sigma-Aldrich) was dissolved in saline and  
522 administered at 2mg/Kg IP, or an equal volume of saline for control, followed by euthanasia 30  
523 minutes later.

524

525 Treatment and control groups were euthanized in a staggered manner to minimize circadian  
526 differences between groups. Naive mice remained in their home cages prior to euthanasia. For  
527 tissue collection, the animals were sacrificed by cervical dislocation and the brains were rapidly  
528 extracted and submerged in ice-cold PBS. To isolate the medial prefrontal cortex and  
529 hippocampus, the brain was placed ventral side up in an Alto coronal 0.5mm mouse matrix  
530 resting on ice. Three coronal cuts were administered with razor blades, one separating the PFC  
531 from the olfactory bulb, one placed approximately around the optic chiasm to separate the PFC  
532 from the hippocampus, and one placed within the cerebellum for stability. The pieces containing  
533 the mPFC and hippocampi were placed in an ice-cold PBS-filled dish for isolation with a  
534 dissection microscope. To isolate the mPFC, a horizontal cut was administered just above the  
535 anterior olfactory nucleus with a razor blade. Two longitudinal cuts were made medial to the  
536 anterior forceps of the corpus collosum. Whole hippocampi were unfurled and isolated from  
537 within the cortex. White matter and either meninges, or choroid plexus [100], were removed to  
538 prevent contamination. Tissue was flash frozen in liquid nitrogen and stored at -80 °C until  
539 processing.

540

### 541 **Mixed Glial Cultures and Treatments**

542 For mixed glial cultures, Swiss-Webster timed-pregnant mice were ordered from Charles River  
543 (stock number 024). Cortical glia from pups younger than postnatal day 6 were cultured  
544 essentially as described [101]. Briefly, cortices were dissociated with papain (Worthington  
545 Biochemical) and plated onto non-coated 10 cm petri dishes. Mixed glia were cultured for a  
546 minimum of one week in DMEM containing 10% FBS, GlutaMAX, and Pen-Strep at 37°C and



547 5% CO<sub>2</sub>. For treatment with glucocorticoid receptor agonist, dexamethasone (Sigma-Aldrich)  
548 was dissolved in DMSO and applied to the media at 100nM. For ChIP experiments, the cultured  
549 cells were fixed by diluting 16% Methanol-free Paraformaldehyde (Electron Microscopy  
550 Sciences) to 1% in the culturing media and rocked for 10 minutes, before quenching with 0.25M  
551 Tris pH 8 (a more effective quencher than glycine [102]). Cells were then scraped, and nuclei  
552 were released by resuspending in NF1 buffer (0.5% Triton X-100, 0.1M Sucrose, 5mM MgCl<sub>2</sub>,  
553 1mM EDTA) and dounce-homogenized with a loose pestle for 30 strokes. Nuclei were  
554 centrifuged for 15 minutes 2000 RCF 4°C and the supernatant aspirated, leaving nuclei for  
555 downstream applications.

556

### 557 **Tissue Homogenization**

558 Tissue was dissociated with a motorized pestle (Argos Technologies) in 0.3-0.5mL ice cold PBS  
559 treated with protease and phosphatase inhibitors (cOMplete & PhosSTOP; Roche). For RNA  
560 isolation, RNase inhibitors were added to all buffers (RiboLock (Thermo Scientific) or  
561 SUPERaseIn (Invitrogen); 1:100 for homogenization, 1:1000 for buffers with BSA, and 1:10,000  
562 for other buffers). Dissociated brain tissue was fixed in 10 mL of 1% Methanol-free  
563 Paraformaldehyde (16%; Electron Microscopy Sciences) for 10 minutes before quenching with  
564 0.25M Tris-HCl pH 8 (a more effective quencher than glycine [102]). Homogenate was  
565 centrifuged for 15 minutes 2000 RCF 4°C and the supernatant aspirated. Nuclei were released by  
566 resuspending in NF1 buffer (0.5% Triton X-100, 0.1M Sucrose, 5mM MgCl<sub>2</sub>, 1mM EDTA) and  
567 dounce-homogenized with a loose pestle for 30 strokes, then filtered with 70uM cell strainers  
568 (Falcon). Nuclei were centrifuged for 15 minutes 2000 RCF 4°C and the supernatant aspirated,  
569 leaving nuclei for downstream applications.

570

### 571 **Whole-cell mRNA processing**

572 Extraction of mRNA from whole tissue and cultured mixed glia was performed with the RNeasy  
573 mini kit (Qiagen). For brain tissue, homogenization was performed by aspirating the tissue in  
574 RLT Plus buffer through a 20-gauge needle and syringe approximately 10 times until  
575 homogenized. For cell culture, the media was aspirated before RLT Plus was added and  
576 distributed with rocking. Purification proceeded as described by the manufacturer. Isolated RNA  
577 was quantified on a NanoDrop spectrophotometer (Thermo Fisher Scientific) and 1ug RNA was  
578 used to make cDNA with the OligodT RNA to cDNA EcoDry Premix (Takara) according to the  
579 manufacturer's instructions, before proceeding to qPCR analysis.

580

### 581 **qPCR**

582 For qPCR analysis, diluted cDNA or genomic DNA was subjected to quantitative real-time PCR  
583 in triplicate with the indicated primers using Ssofast EvaGreen Supermix (Bio-Rad) in a CFX  
584 Connect Real-Time System (Bio-Rad). For gene expression analysis, normalization was against  
585 *Hprt* using the  $\Delta\Delta CT$  method. For ChIP, normalization was against Input. Primer sequences can  
586 be found in S1 Table.

587

### 588 **Flow Cytometry**

589 Fixed brain nuclei (see 'Tissue Homogenization') were resuspended in 1mL 0.5% BSA in PBS  
590 (IgG-Free, Protease-Free; Jackson ImmunoResearch). Nuclei were stained in Eppendorf tubes  
591 with the relevant antibodies rocking for 30-60 minutes at 4°C. For neuron and glia isolation,  
592 nuclei were stained with NeuN AF488 (1:1000; clone MAB377X; Millipore). For neuron and

593 glial subtype isolation, nuclei were stained with NeuN AF488 (1:1000; clone MAB377X;  
594 Millipore), GFAP AF647 (1:200; clone GA5; Cell Signaling Technology), and PU.1 PE (1:200;  
595 clone 9G7; Cell Signaling Technology). To stain for the glucocorticoid receptor, nuclei were  
596 incubated with Polyclonal Glucocorticoid Receptor (2 ug; clone PA1-511A, Thermo Fisher  
597 Scientific) followed by Donkey anti-Rabbit IgG AF647 (0.5ug; A-31573; Thermo Fisher  
598 Scientific). To stain for HSF1 receptor, nuclei were incubated with anti-HSF1(1:250; 4356S;  
599 Cell Signaling Technologies) followed by Donkey anti-Rabbit IgG AF647 (0.5ug; A-31573;  
600 Thermo Fisher Scientific). Nuclei were pelleted between steps by centrifugation for 10-15  
601 minutes at 2000RCF at 4°C. Finally, to help gate for singlet nuclei, 1:1000 DAPI (Sigma-  
602 Aldrich) was added to the buffer just prior to flow cytometry. Nuclei were then run on a LSRII  
603 cytometer (BD Biosciences) or isolated with a BD FACSAria (BD Biosciences) cell sorter into  
604 1% BSA PBS with inhibitors. The data was analyzed with FlowJo software (FlowJo LLC).  
605

### 606 **Nuclear RNA isolation, cDNA generation, and sequencing**

607 FACS-isolated nuclei (see ‘Flow Cytometry’) were pelleted by centrifugation for 15 minutes at  
608 2000RCF at 4°C. To decrosslink the nuclei, the RecoverAll Total Nucleic Acid Isolation Kit for  
609 FFPE (Thermo Fisher Scientific) was utilized following the manufacturer’s instructions. Briefly,  
610 nuclei were resuspended in 200uL digestion buffer with 4 uL protease (an equal volume of  
611 protease K (NEB) was substituted if the manufacturer-provided protease was exhausted) for 15  
612 minutes at 50C, then 15 minutes at 80C. To isolate the RNA and eliminate most DNA prior to  
613 DNAase treatment, 800uL TRIzol LS (Invitrogen) was added, mixed well, and incubated for 5  
614 minutes at room temperature before proceeding with isolation or freezing at -80C. 215uL  
615 chloroform was added to the solution and vortexed vigorously for 30 seconds before adding to a  
616 5Prime Phase Lock Gel Heavy tube (Quantabio) and centrifuged for 15 minutes at 12,000g at 4C  
617 before transfer to an eppendorf tube. An equal volume of 100% ethanol (800uL) was added  
618 immediately and mixed well before proceeding to RNA isolation with the Direct-zol RNA  
619 Microprep Kit (Zymo Research). DNase treatment and RNA isolation proceeded according to  
620 the manufacturer’s instructions, before elution in 6-20uL water.  
621

622 The generation of cDNA from the isolated nuclear RNA was performed with SuperScript III or  
623 IV (Invitrogen) according to the manufacturer’s instructions, priming with either random  
624 hexamer or oligo(dT) primers. Diluted cDNA was then utilized for qPCR (see ‘qPCR’).  
625 For library preparation, RNA concentration and quality was assessed with a Fragment Analyzer  
626 (Agilent), yielding an RNA fragment distribution concentrated between approximately 200bp to  
627 6000bp. RNA-Seq libraries were generated with the SMARTer Stranded Total RNA-Seq Kit -  
628 Pico Input Mammalian (v1 or v2; Takara) according to the manufacturer’s instructions. Because  
629 the RNA was already partially degraded during the fixation and decrosslinking procedure, the  
630 RNA fragmentation time was 90 seconds. Paired end sequencing was performed with a  
631 NextSeq500 at the MIT BioMicro Center.  
632

### 633 **ChIP and ChIP-seq**

634 Performed similar to [103]. Pelleted nuclei from cultured mixed glia (see ‘Mixed Glial Cultures  
635 and Treatments’) or dissociated brain tissue combined from three different animals’ hippocampi  
636 or mPFC (see ‘Tissue Homogenization’), were lysed by the addition of 400 µl LB3 (1mM EDTA  
637 pH 8, 0.5mM EGTA pH 8, 10 mM Tris pH 8, 0.5% Sarkosyl solution) and split into 2 tubes and  
638 sonicated on ‘HIGH’ for 30-40 cycles (30” on and 30” off) in a Bioruptor bath sonicator

639 (Diagenode). The immunoprecipitation was prepared by diluting 15-30ug of the chromatin into  
640 1% Triton X-100, 0.1 % sodium deoxycholate, 1 mM EDTA plus protease and phosphatase  
641 tablets (cOmplete & PhosSTOP; Roche) and preclearing with Protein A Dynabeads (Life  
642 Technologies) blocked with BSA. Then 5 ug anti- $\gamma$ H2AX (ab2893; Abcam) or 10 uL anti-HSF1  
643 (clone 4356S; Cell Signaling Technologies) were added and the chromatin rotated overnight.  
644 BSA blocked Protein A Dynabeads (Life Technologies) were added and rocked for 4 hours  
645 before 4 washes with RIPA buffer (50 mM HEPES, pH 7.6, 10 mM EDTA, 0.7 % sodium  
646 Deoxycholate, 1 % NP-40, 0.5 M LiCl) and one wash with T<sub>50</sub>E<sub>10</sub> buffer (50 mM Tris-HCl pH  
647 8.0, 10 mM EDTA) before resuspending beads in T<sub>50</sub>E<sub>10</sub>S<sub>1</sub> buffer (50 mM Tris-HCl pH 8.0, 10  
648 mM EDTA, 1% SDS) and heating to 65C for 15 minutes to elute DNA. After transferring to a  
649 new tube, DNA was decrosslinked by leaving at 65C for 5 hours to overnight. DNA was treated  
650 with Proteinase K (NEB) and RNase (Roche) before purification with  
651 phenol:chloroform:isoamyl-alcohol 1 Phase (VWR), 5Prime Phase Lock Gel Heavy tube  
652 (Quantabio), and glycogen (sigma Aldrich) to facilitate DNA pelleting. Resuspended CHIP and  
653 Input DNA was then used for qPCR or CHIP-Seq. Library preparation utilized a HyperPrep Kit  
654 (Kapa Biosystems) and NEXTFLEX DNA Barcodes (Perkin Elmer), with size selection  
655 performed with Agencourt AMPure XP (Beckman Coulter). Libraries were sequenced on the  
656 Illumina HiSeq2000 at the MIT BioMicro Center.  $\gamma$ H2AX CHIP-Seq was performed with three  
657 or four biological replicates.

658

#### 659 **RNA-Seq analysis**

660 To eliminate nucleotides that are part of the template-switching oligo as per the manufacturer's  
661 instructions (SMARTer Stranded Total RNA-Seq Kit - Pico Input Mammalian; v1 [mPFC] or v2  
662 [HIP]; Takara), the first three nucleotides of the first sequencing read (Read 1) for kit v1 or the  
663 first three nucleotides of the second sequencing read (Read 2) for kit v2 were trimmed with  
664 Trimmomatic [104]. Trimmed reads were then aligned to the mouse genome GRCm38 (mm10)  
665 with HISAT2 [105] using default parameters. Picard MarkDuplicates  
666 (<http://broadinstitute.github.io/picard/>) was used to remove duplicate reads and the remaining  
667 reads sorted and indexed with SAMtools [106]. Read counts aligning to the entire gene body of  
668 each gene (introns and exons) were generated using featureCounts [107]. Analysis of differential  
669 gene expression and FPKM values were then performed with DESeq2 [108] in R, with  
670 significance determined with  $p_{adj} < 0.05$ , and  $FPKM > 0.2$  in at least one time point. To assess  
671 successful isolation of brain cell types, aggregate expression of known cell type-enriched genes  
672 was determined by taking the geometric mean of the naive FPKM values for each cell type's  
673 gene set [28], calculating the Z-score, and plotting with the R package pheatmap. To make  
674 combined signal tracks, SAMtools [106] was used to down sample replicates to an equal number  
675 of reads, before merging and generating normalized signal tracks with deepTools [109]. Genome  
676 browser signal tracks were generated with IGV [110]. Plotting was done with the ggplot2  
677 package in R.

678

#### 679 **ChIP-Seq analysis**

680 ChIP-Seq reads were aligned to the mouse genome GRCm38 (mm10) with Bowtie2 [111] with  
681 default parameters. Picard MarkDuplicates (<http://broadinstitute.github.io/picard/>) was used to  
682 remove duplicate reads. Poorly aligned reads were then filtered out ( $MAPQ > 10$ ) and the  
683 remaining reads sorted and indexed with SAMtools [106]. SAMtools [106] was used to down  
684 sample ChIP replicates to an equivalent number of reads before merging. Peaks were called with

685 MACS2 [112] using a broad-cutoff of 0.00001. To get peaks more representative of the  
686 underlying signal, peaks were recalled with MACS2 using --broad-cutoff 0.1, and bedtools  
687 intersect [113] was used to get the overlap with the more stringently called peaks. Bedtools  
688 intersect [113] was then used to annotate peaks overlapping genes with a minimum of 50%  
689 overlap with the GRCm38.93 (mm10) GTF annotation file, with manual inspection of genome  
690 browser tracks for correction. Read counts for either gene bodies or called peaks were generated  
691 using featureCounts [107]. Analysis of differential peaks and RPKM values was then performed  
692 with DESeq2 [108] in R. MACS2 [112] was used to make read normalized (-SPMR) LogLR  
693 signal tracks and these were converted to the bigwig file format with bedGraphToBigWig [114].  
694 Aggregate signal plots were generated with deepTools [109]. Venn diagrams of shared peaks  
695 was generated with the 'eurlerr' R package. Genome browser signal tracks were generated with  
696 IGV [110]. Plotting was done with the ggplot2 package in R.

697  
698 For analysis of H3K27Ac data [57], FASTQ files were downloaded from the gene expression  
699 omnibus, accession code GSE74971. Replicates were combined before alignment and filtering,  
700 which proceeded as above. Normalized read coverage signal tracks were generated with  
701 deepTools [109].  
702

703 Permutation testing was performed similar to [115]. Neuronal upregulated genes were divided  
704 into bins by expression level. Using these bins, 1000 iterations of random sampling without  
705 replacement was conducted on all expressed genes. A weighted mean of average FPKM for the  
706 CFC 30-minute time point, accounting for the approximate neuronal (NeuN+; 60%) and non-  
707 neuronal (NeuN-; 40%) composition of whole tissue, was used as the gene expression level for  
708 each gene to allow comparison with the whole tissue  $\gamma$ H2AX ChIP-Seq. A P-value was then  
709 calculated as the fraction of permutations that had higher mean  $\gamma$ H2AX or RNA intensity than  
710 that for the observed upregulated genes. Plotting was done with the ggplot2 package in R.  
711

## 712 **GO and motif analysis**

713 To find promoter TF motif overrepresentation, the 'enricher' function of the clusterProfiler R  
714 package [21] was utilized with the MSigDB database [32] through the msigdbR package using  
715 the category "C3" and subcategory "TFT" with a pvalueCutoff = 0.01 and all expressed genes for  
716 the pertinent condition used as background. To determine overrepresentation of biological  
717 process GOs, the 'enrichGO' function of clusterProfiler [21] was utilized with the org.Mm.eg.db  
718 Bioconductor annotation R package, with a pvalueCutoff = 0.01 and expressed genes used as  
719 background. Redundant GO categories were then removed with the clusterProfiler [21] function  
720 'simplify', an implementation of GOSemSim [116], with similarity set at 0.7. Disease  
721 overrepresentation analysis utilized the DOSE R package [117] with a Q-value cutoff of 0.2 and  
722 expressed genes used as background. Plotting was done with the ggplot2 package in R.  
723 Clustering of related top GO terms was performed with the 'emaplot' function of the  
724 clusterProfiler [21].  
725

## 726 **Glucocorticoid receptor external dataset analysis**

727 Glucocorticoid receptor ChIP-Seq peaks from rat were downloaded from supplementary tables  
728 of [55,56] and UCSC liftover [114] was used to convert the coordinates to the mouse MM10  
729 genome. Peaks were merged with bedtools [113]. The presence of a mouse glucocorticoid  
730 receptor motif was determined by scanning the DNA sequence of each peak, obtained through

731 the R package biomaRt [118], for the presence of the “GCR\_MOUSE.H11MO.0.A” motif from  
732 the HOCOMOCO motif collection [119] with of the FIMO tool [120] of the MEME Suite [121].  
733 GREAT [122] was used to annotate these peaks to the mouse genome, using “single nearest  
734 gene” as the annotation parameter. Plots of aggregate H3K27Ac [57] (see ‘ChIP-Seq analysis’)  
735 signal at glucocorticoid receptor peaks were generated with deepTools [109].

736

### 737 **Statistical analysis**

738 Two-tailed unpaired student’s t-test and One-way ANOVA with Tukey’s multiple comparisons  
739 test were performed with GraphPad PRISM (Version 8).  $P \leq 0.05$  was considered statistically  
740 significant. Bar and scatter plots show the Mean  $\pm$  SEM. Outliers were detected with ROUT (Q =  
741 2%). Other statistical tests were performed in R, including the hypergeometric distribution test  
742 using the ‘phyper’ function, linear regression with the ‘lm’ function, and Welch’s ANOVA with  
743 Games-Howell post-hoc test with the ‘oneway’ function.

744

### 745 **Data Availability**

746 Sequencing data files were submitted to the Gene Expression Omnibus (GEO;  
747 <https://www.ncbi.nlm.nih.gov/geo/>) repository (GSE155095)

748

## 749 **Acknowledgements**

750 We thank, Jay Penney, Hugh Cam, Matheus Victor, Omer Durak, Ping-Chieh Pao, Vishnu  
751 Dileep, and Ram Madabhushi for thoughtful comments and feedback on the manuscript; Jemmie  
752 Cheng for nuclear FACS optimization; Ram Madabhushi and Jemmie Cheng for ChIP guidance;  
753 Ping-Chieh Pao, Audrey Lee, and Chinnakkaruppan Adaikkan for experimental assistance; Ying  
754 Zhou for laboratory management; Erica McNamara for maintaining the mouse colony; the  
755 members of the Tsai laboratory for feedback and advice on this project.

756

## 757 **Funding**

758 This work was supported by research grants from National Institutes of Health  
759 <https://www.nih.gov/> (R01NS102730-01), the Glenn Foundation for Medical Research  
760 <https://glennfoundation.org/> and the JPB Foundation <https://www.jpbfoundation.org/> to LHT. RS  
761 was the recipient of the MIT Presidential Fellowship, the Barbara Weedon Fellowship, and the  
762 Lord Foundation Fellowship. The funders had no role in study design, data collection and  
763 analysis, decision to publish, or preparation of the manuscript.

764

## 765 **Competing interests**

766 None Declared

767

## 768 **References**

- 769 1. Chow HM, Herrup K. Genomic integrity and the ageing brain. *Nature Reviews*  
770 *Neuroscience*. Nature Publishing Group; 2015. pp. 672–684. doi:10.1038/nrn4020
- 771 2. Suberbielle E, Sanchez PE, Kravitz A V., Wang X, Ho K, Eilertson K, et al. Physiologic  
772 brain activity causes DNA double-strand breaks in neurons, with exacerbation by  
773 amyloid- $\beta$ . *Nat Neurosci*. 2013;16: 613–21. doi:10.1038/nn.3356
- 774 3. Crowe SL, Movsesyan VA, Jorgensen TJ, Kondratyev A. Rapid phosphorylation of

- 775 histone H2A.X following ionotropic glutamate receptor activation. *Eur J Neurosci*.  
776 2006;23: 2351–61. doi:10.1111/j.1460-9568.2006.04768.x
- 777 4. Madabhushi R, Gao F, Pfenning AR, Pan L, Yamakawa S, Seo J, et al. Activity-Induced  
778 DNA Breaks Govern the Expression of Neuronal Early-Response Genes. *Cell*. 2015;161:  
779 1592–1605. doi:10.1016/j.cell.2015.05.032
- 780 5. Zada D, Bronshtein I, Lerer-Goldshtein T, Garini Y, Appelbaum L. Sleep increases  
781 chromosome dynamics to enable reduction of accumulating DNA damage in single  
782 neurons. *Nat Commun*. 2019;10: 1–12. doi:10.1038/s41467-019-08806-w
- 783 6. Crowe SL, Tsukerman S, Gale K, Jorgensen TJ, Kondratyev AD. Phosphorylation of  
784 histone H2A.X as an early marker of neuronal endangerment following seizures in the  
785 adult rat brain. *J Neurosci*. 2011;31: 7648–7656. doi:10.1523/JNEUROSCI.0092-11.2011
- 786 7. Li X, Marshall PR, Leighton LJ, Zajackowski EL, Wang Z, Madugalle SU, et al. The  
787 DNA repair-associated protein gadd45 $\gamma$  regulates the temporal coding of immediate early  
788 gene expression within the prelimbic prefrontal cortex and is required for the  
789 consolidation of associative fear memory. *J Neurosci*. 2019;39: 970–983.  
790 doi:10.1523/JNEUROSCI.2024-18.2018
- 791 8. Rogakou EP, Pilch DR, Orr AH, Ivanova VS, Bonner WM. DNA double-stranded breaks  
792 induce histone H2AX phosphorylation on serine 139. *J Biol Chem*. 1998;273: 5858–5868.  
793 doi:10.1074/jbc.273.10.5858
- 794 9. Bellesi M, Bushey D, Chini M, Tononi G, Cirelli C. Contribution of sleep to the repair of  
795 neuronal DNA double-strand breaks: Evidence from flies and mice. *Sci Rep*. 2016;6: 1–  
796 13. doi:10.1038/srep36804
- 797 10. Navabpour S, Rogers J, McFadden T, Jarome TJ. Dna double-strand breaks are a critical  
798 regulator of fear memory reconsolidation. *Int J Mol Sci*. 2020;21: 1–15.  
799 doi:10.3390/ijms21238995
- 800 11. Ju B-G, Lunyak V V, Perissi V, Garcia-Bassets I, Rose DW, Glass CK, et al. A  
801 topoisomerase II $\beta$ -mediated dsDNA break required for regulated transcription. *Science*.  
802 2006;312: 1798–802. doi:10.1126/science.1127196
- 803 12. Lin C, Yang L, Tanasa B, Hutt K, Ju B, Ohgi K, et al. Nuclear receptor-induced  
804 chromosomal proximity and DNA breaks underlie specific translocations in cancer. *Cell*.  
805 2009;139: 1069–83. doi:10.1016/j.cell.2009.11.030
- 806 13. Morrow BA, Elsworth JD, Inglis FM, Roth RH. An antisense oligonucleotide reverses the  
807 footshock-induced expression of fos in the rat medial prefrontal cortex and the subsequent  
808 expression of conditioned fear-induced immobility. *J Neurosci*. 1999;19: 5666–73.  
809 doi:10.1523/jneurosci.19-13-05666.1999
- 810 14. Haffner MC, Aryee MJ, Toubaji A, Esopi DM, Albadine R, Gurel B, et al. Androgen-  
811 induced TOP2B-mediated double-strand breaks and prostate cancer gene rearrangements.  
812 *Nat Genet*. 2010;42: 668–75. doi:10.1038/ng.613
- 813 15. Bunch H, Lawney BP, Lin YF, Asaithamby A, Murshid A, Wang YE, et al.  
814 Transcriptional elongation requires DNA break-induced signalling. *Nat Commun*. 2015;6.  
815 doi:10.1038/ncomms10191
- 816 16. Maren S, Phan KL, Liberzon I. The contextual brain: Implications for fear conditioning,  
817 extinction and psychopathology. *Nature Reviews Neuroscience*. Nature Publishing Group;  
818 2013. pp. 417–428. doi:10.1038/nrn3492
- 819 17. Boulianne B, Robinson ME, May PC, Castellano L, Blighe K, Thomas J, et al. Lineage-  
820 Specific Genes Are Prominent DNA Damage Hotspots during Leukemic Transformation

- 821 of B Cell Precursors. *Cell Rep.* 2017;18: 1687–1698. doi:10.1016/j.celrep.2017.01.057
- 822 18. Clouaire T, Rocher V, Lashgari A, Arnould C, Aguirrebengoa M, Biernacka A, et al.
- 823 Comprehensive Mapping of Histone Modifications at DNA Double-Strand Breaks
- 824 Deciphers Repair Pathway Chromatin Signatures. *Mol Cell.* 2018;72: 250-262.e6.
- 825 doi:10.1016/j.molcel.2018.08.020
- 826 19. Aymard F, Aguirrebengoa M, Guillou E, Javierre BM, Bugler B, Arnould C, et al.
- 827 Genome-wide mapping of long-range contacts unveils clustering of DNA double-strand
- 828 breaks at damaged active genes. *Nat Struct Mol Biol.* 2017;24: 353–361.
- 829 doi:10.1038/nsmb.3387
- 830 20. Iannelli F, Galbiati A, Capozzo I, Nguyen Q, Magnuson B, Michelini F, et al. A damaged
- 831 genome’s transcriptional landscape through multilayered expression profiling around in
- 832 situ-mapped DNA double-strand breaks. *Nat Commun.* 2017;8.
- 833 doi:10.1038/ncomms15656
- 834 21. Yu G, Wang LG, Han Y, He QY. ClusterProfiler: An R package for comparing biological
- 835 themes among gene clusters. *Omi A J Integr Biol.* 2012;16: 284–287.
- 836 doi:10.1089/omi.2011.0118
- 837 22. Lisman J, Yasuda R, Raghavachari S. Mechanisms of CaMKII action in long-term
- 838 potentiation. *Nature Reviews Neuroscience.* Nature Publishing Group; 2012. pp. 169–182.
- 839 doi:10.1038/nrn3192
- 840 23. Yap EL, Greenberg ME. Activity-Regulated Transcription: Bridging the Gap between
- 841 Neural Activity and Behavior. *Neuron.* Cell Press; 2018. pp. 330–348.
- 842 doi:10.1016/j.neuron.2018.10.013
- 843 24. Seeburg DP, Sheng M. Activity-induced polo-like kinase 2 is required for homeostatic
- 844 plasticity of hippocampal neurons during epileptiform activity. *J Neurosci.* 2008;28:
- 845 6583–6591. doi:10.1523/JNEUROSCI.1853-08.2008
- 846 25. Madabhushi R, Pan L, Tsai LH. DNA damage and its links to neurodegeneration. *Neuron.*
- 847 *Cell Press;* 2014. pp. 266–282. doi:10.1016/j.neuron.2014.06.034
- 848 26. Mullen RJ, Buck CR, Smith AM. NeuN, a neuronal specific nuclear protein in vertebrates.
- 849 *Development.* 1992;116: 201–211.
- 850 27. Lin Y, Bloodgood BL, Hauser JL, Lapan AD, Koon AC, Kim TK, et al. Activity-
- 851 dependent regulation of inhibitory synapse development by Npas4. *Nature.* 2008;455:
- 852 1198–1204. doi:10.1038/nature07319
- 853 28. Habib N, Avraham-Davidi I, Basu A, Burks T, Shekhar K, Hofree M, et al. Massively
- 854 parallel single-nucleus RNA-seq with DroNc-seq. *Nat Methods.* 2017;14: 955–958.
- 855 doi:10.1038/nmeth.4407
- 856 29. Schwer B, Wei P-CC, Chang AN, Kao J, Du Z, Meyers RM, et al. Transcription-
- 857 associated processes cause DNA double-strand breaks and translocations in neural
- 858 stem/progenitor cells. 2016;113: 2258–2263. Available:
- 859 <https://www.pnas.org/content/113/8/2258>
- 860 30. Lensing S V., Marsico G, Hänsel-Hertsch R, Lam EY, Tannahill D, Balasubramanian S.
- 861 DSBCapture: In situ capture and sequencing of DNA breaks. *Nat Methods.* 2016;13: 855–
- 862 857. doi:10.1038/nmeth.3960
- 863 31. Yan WX, Mirzazadeh R, Garnerone S, Scott D, Schneider MW, Kallas T, et al. BLISS is a
- 864 versatile and quantitative method for genome-wide profiling of DNA double-strand
- 865 breaks. *Nat Commun.* 2017;8: 1–9. doi:10.1038/ncomms15058
- 866 32. Liberzon A, Subramanian A, Pinchback R, Thorvaldsdóttir H, Tamayo P, Mesirov JP.

- 867 Molecular signatures database (MSigDB) 3.0. *Bioinformatics*. 2011;27: 1739–1740.  
868 doi:10.1093/bioinformatics/btr260
- 869 33. Hawk JD, Bookout AL, Poplawski SG, Bridi M, Rao AJ, Sulewski ME, et al. NR4A  
870 nuclear receptors support memory enhancement by histone deacetylase inhibitors. *J Clin*  
871 *Invest*. 2012;122: 3593–3602. doi:10.1172/JCI64145
- 872 34. Benito E, Valor LM, Jimenez-Minchan M, Huber W, Barco A. cAMP response element-  
873 binding protein is a primary hub of activity-driven neuronal gene expression. *J Neurosci*.  
874 2011;31: 18237–18250. doi:10.1523/JNEUROSCI.4554-11.2011
- 875 35. Bozon B, Davis S, Laroche S. A requirement for the immediate early gene *zif268* in  
876 reconsolidation of recognition memory after retrieval. *Neuron*. 2003;40: 695–701.  
877 doi:10.1016/S0896-6273(03)00674-3
- 878 36. Ramamoorthi K, Fropf R, Belfort GM, Fitzmaurice HL, McKinney RM, Neve RL, et al.  
879 *Npas4* regulates a transcriptional program in CA3 required for contextual memory  
880 formation. *Science*. 2011;334: 1669–75. doi:10.1126/science.1208049
- 881 37. Ramanan N, Shen Y, Sarsfield S, Lemberger T, Schütz G, Linden DJ, et al. SRF mediates  
882 activity-induced gene expression and synaptic plasticity but not neuronal viability. *Nat*  
883 *Neurosci*. 2005;8: 759–767. doi:10.1038/nn1462
- 884 38. Nudelman AS, DiRocco DP, Lambert TJ, Garelick MG, Le J, Nathanson NM, et al.  
885 Neuronal activity rapidly induces transcription of the CREB-regulated microRNA-132, *in*  
886 *vivo*. *Hippocampus*. 2009;20: NA-NA. doi:10.1002/hipo.20646
- 887 39. Kawashima T, Okuno H, Nonaka M, Adachi-Morishima A, Kyo N, Okamura M, et al.  
888 Synaptic activity-responsive element in the *Arc/Arg3.1* promoter essential for synapse-to-  
889 nucleus signaling in activated neurons. *Proc Natl Acad Sci U S A*. 2009;106: 316–321.  
890 doi:10.1073/pnas.0806518106
- 891 40. Hansen KF, Sakamoto K, Aten S, Snider KH, Loeser J, Hesse AM, et al. Targeted  
892 deletion of miR-132/-212 impairs memory and alters the hippocampal transcriptome.  
893 *Learn Mem*. 2016;23: 61–71. doi:10.1101/lm.039578.115
- 894 41. Herschman HR. Primary Response Genes Induced by Growth Factors and Tumor  
895 Promoters. *Annu Rev Biochem*. 1991;60: 281–319.  
896 doi:10.1146/annurev.bi.60.070191.001433
- 897 42. Hrvatin S, Hochbaum DR, Nagy MA, Cicconet M, Robertson K, Cheadle L, et al. Single-  
898 cell analysis of experience-dependent transcriptomic states in the mouse visual cortex. *Nat*  
899 *Neurosci*. 2018;21: 120–129. doi:10.1038/s41593-017-0029-5
- 900 43. Morimoto RI. Regulation of the heat shock transcriptional response: Cross talk between a  
901 family of heat shock factors, molecular chaperones, and negative regulators. *Genes and*  
902 *Development*. Cold Spring Harbor Laboratory Press; 1998. pp. 3788–3796.  
903 doi:10.1101/gad.12.24.3788
- 904 44. Adamsky A, Kol A, Kreisel T, Doron A, Ozeri-Engelhard N, Melcer T, et al. Astrocytic  
905 Activation Generates De Novo Neuronal Potentiation and Memory Enhancement. *Cell*.  
906 2018;174: 59-71.e14. doi:10.1016/j.cell.2018.05.002
- 907 45. Mahat DB, Salamanca HH, Duarte FM, Danko CG, Lis JT. Mammalian Heat Shock  
908 Response and Mechanisms Underlying Its Genome-wide Transcriptional Regulation. *Mol*  
909 *Cell*. 2016;62: 63–78. doi:10.1016/j.molcel.2016.02.025
- 910 46. Walter P, Ron D. The unfolded protein response: From stress pathway to homeostatic  
911 regulation. *Science*. American Association for the Advancement of Science; 2011. pp.  
912 1081–1086. doi:10.1126/science.1209038



- 913 47. Yoshida H, Haze K, Yanagi H, Yura T, Mori K. Identification of the cis-acting  
914 endoplasmic reticulum stress response element responsible for transcriptional induction of  
915 mammalian glucose- regulated proteins: Involvement of basic leucine zipper transcription  
916 factors. *J Biol Chem*. 1998;273: 33741–33749. doi:10.1074/jbc.273.50.33741
- 917 48. Yoshida H, Matsui T, Yamamoto A, Okada T, Mori K. XBP1 mRNA is induced by ATF6  
918 and spliced by IRE1 in response to ER stress to produce a highly active transcription  
919 factor. *Cell*. 2001;107: 881–891. doi:10.1016/S0092-8674(01)00611-0
- 920 49. Belmont PJ, Tadimalla A, Chen WJ, Martindale JJ, Thuerlauf DJ, Marcinko M, et al.  
921 Coordination of growth and endoplasmic reticulum stress signaling by regulator of  
922 calcineurin 1 (RCAN1), a novel ATF6-inducible gene. *J Biol Chem*. 2008;283: 14012–  
923 14021. doi:10.1074/jbc.M709776200
- 924 50. Miyata S, Koyama Y, Takemoto K, Yoshikawa K, Ishikawa T, Taniguchi M, et al. Plasma  
925 Corticosterone Activates SGK1 and Induces Morphological Changes in Oligodendrocytes  
926 in Corpus Callosum. Yoshikawa T, editor. *PLoS One*. 2011;6: e19859.  
927 doi:10.1371/journal.pone.0019859
- 928 51. Wang Z, Malone MH, Thomenius MJ, Zhong F, Xu F, Distelhorst CW. Dexamethasone-  
929 induced gene 2 (dig2) is a novel pro-survival stress gene induced rapidly by diverse  
930 apoptotic signals. *J Biol Chem*. 2003;278: 27053–27058. doi:10.1074/jbc.M303723200
- 931 52. Revest JM, Le Roux A, Roullot-Lacarrière V, Kaouane N, Vallée M, Kasanetz F, et al.  
932 BDNF-TrkB signaling through Erk1/2MAPK phosphorylation mediates the enhancement  
933 of fear memory induced by glucocorticoids. *Mol Psychiatry*. 2014;19: 1001–1009.  
934 doi:10.1038/mp.2013.134
- 935 53. Heinzmann JM, Thoeringer CK, Knapman A, Palme R, Holsboer F, Uhr M, et al.  
936 Intrahippocampal corticosterone response in mice selectively bred for extremes in stress  
937 reactivity: A microdialysis study. *J Neuroendocrinol*. 2010;22: 1187–1197.  
938 doi:10.1111/j.1365-2826.2010.02062.x
- 939 54. Mahfouz A, Lelieveldt BPF, Grefhorst A, Van Weert LTCM, Mol IM, Sips HCM, et al.  
940 Genome-wide coexpression of steroid receptors in the mouse brain: Identifying signaling  
941 pathways and functionally coordinated regions. *Proc Natl Acad Sci U S A*. 2016;113:  
942 2738–2743. doi:10.1073/pnas.1520376113
- 943 55. Polman JAE, De Kloet ER, Datson NA. Two populations of glucocorticoid receptor-  
944 binding sites in the male rat hippocampal genome. *Endocrinology*. 2013;154: 1832–1844.  
945 doi:10.1210/en.2012-2187
- 946 56. Pooley JR, Flynn BP, Grøntved L, Baek S, Guertin MJ, Kershaw YM, et al. Genome-wide  
947 identification of basic helix-loop-helix and NF-1 motifs underlying GR binding sites in  
948 male rat hippocampus. *Endocrinology*. 2017;158: 1486–1501. doi:10.1210/en.2016-1929
- 949 57. Halder R, Hennion M, Vidal RO, Shomroni O, Rahman RU, Rajput A, et al. DNA  
950 methylation changes in plasticity genes accompany the formation and maintenance of  
951 memory. *Nat Neurosci*. 2015;19: 102–110. doi:10.1038/nn.4194
- 952 58. Kelly EJ, Sandgren EP, Brinster RL, Palmiter RD. A pair of adjacent glucocorticoid  
953 response elements regulate expression of two mouse metallothionein genes. *Proc Natl*  
954 *Acad Sci U S A*. 1997;94: 10045–10050. doi:10.1073/pnas.94.19.10045
- 955 59. Chen DY, Bambah-Mukku D, Pollonini G, Alberini CM. Glucocorticoid receptors recruit  
956 the CaMKII $\alpha$ -BDNF-CREB pathways to mediate memory consolidation. *Nat Neurosci*.  
957 2012;15: 1707–1714. doi:10.1038/nn.3266
- 958 60. John S, Sabo PJ, Thurman RE, Sung MH, Biddie SC, Johnson TA, et al. Chromatin

- 959 accessibility pre-determines glucocorticoid receptor binding patterns. *Nature Genetics*.  
960 2011. pp. 264–268. doi:10.1038/ng.759
- 961 61. McReynolds JR, Taylor A, Vranjkovic O, Ambrosius T, Derricks O, Nino B, et al.  
962 Corticosterone Potentiation of Cocaine-Induced Reinstatement of Conditioned Place  
963 Preference in Mice is Mediated by Blockade of the Organic Cation Transporter 3.  
964 *Neuropsychopharmacology*. 2017;42: 757–765. doi:10.1038/npp.2016.187
- 965 62. Gagne D, Pons M, Philibert D. RU 38486: A potent antiglucocorticoid in vitro and in  
966 vivo. *J Steroid Biochem*. 1985;23: 247–251. doi:10.1016/0022-4731(85)90401-7
- 967 63. Piechota M, Korostynski M, Golda S, Ficek J, Jantas D, Barbara Z, et al. Transcriptional  
968 signatures of steroid hormones in the striatal neurons and astrocytes. *BMC Neurosci*.  
969 2017;18: 37. doi:10.1186/s12868-017-0352-5
- 970 64. Greenhalgh AD, David S, Bennett FC. Immune cell regulation of glia during CNS injury  
971 and disease. *Nature Reviews Neuroscience*. *Nature Research*; 2020. pp. 139–152.  
972 doi:10.1038/s41583-020-0263-9
- 973 65. Stevens B. Glia: much more than the neuron’s side-kick. *Current biology : CB*. 2003. pp.  
974 R469-72. doi:10.1016/s0960-9822(03)00404-4
- 975 66. Salter MW, Beggs S. Sublime microglia: Expanding roles for the guardians of the CNS.  
976 *Cell*. *Cell Press*; 2014. pp. 15–24. doi:10.1016/j.cell.2014.06.008
- 977 67. Bétermier M, Bertrand P, Lopez BS. Is Non-Homologous End-Joining Really an  
978 Inherently Error-Prone Process? Jinks-Robertson S, editor. *PLoS Genet*. 2014;10:  
979 e1004086. doi:10.1371/journal.pgen.1004086
- 980 68. White RR, Vijg J. Do DNA Double-Strand Breaks Drive Aging? *Molecular Cell*. *Cell*  
981 *Press*; 2016. pp. 729–738. doi:10.1016/j.molcel.2016.08.004
- 982 69. Enge M, Arda HE, Mignardi M, Beausang J, Bottino R, Kim SK, et al. Single-Cell  
983 Analysis of Human Pancreas Reveals Transcriptional Signatures of Aging and Somatic  
984 Mutation Patterns. *Cell*. 2017;171: 321-330.e14. doi:10.1016/j.cell.2017.09.004
- 985 70. Mathys H, Davila-Velderrain J, Peng Z, Gao F, Mohammadi S, Young JZ, et al. Single-  
986 cell transcriptomic analysis of Alzheimer’s disease. *Nature*. 2019;570: 332–337.  
987 doi:10.1038/s41586-019-1195-2
- 988 71. Shanbhag NM, Evans MD, Mao W, Nana AL, Seeley WW, Adame A, et al. Early  
989 neuronal accumulation of DNA double strand breaks in Alzheimer’s disease. *Acta*  
990 *Neuropathol Commun*. 2019;7: 1–18. doi:10.1186/s40478-019-0723-5
- 991 72. Merlo D, Mollinari C, Racaniello M, Garaci E, Cardinale A. DNA Double Strand Breaks:  
992 A Common Theme in Neurodegenerative Diseases. *Curr Alzheimer Res*. 2016;13: 1208–  
993 1218. doi:10.2174/1567205013666160401114915
- 994 73. Meng FL, Du Z, Federation A, Hu J, Wang Q, Kieffer-Kwon KR, et al. Convergent  
995 transcription at intragenic super-enhancers targets AID-initiated genomic instability. *Cell*.  
996 2014;159: 1538–1548. doi:10.1016/j.cell.2014.11.014
- 997 74. Yeganeh M, Praz V, Cousin P, Hernandez N. Transcriptional interference by RNA  
998 polymerase III affects expression of the Polr3e gene. *Genes Dev*. 2017;31: 413–421.  
999 doi:10.1101/gad.293324.116
- 1000 75. Flint MS, Baum A, Chambers WH, Jenkins FJ. Induction of DNA damage, alteration of  
1001 DNA repair and transcriptional activation by stress hormones. *Psychoneuroendocrinology*.  
1002 2007;32: 470–479. doi:10.1016/j.psyneuen.2007.02.013
- 1003 76. Avey D, Sankararaman S, Yim AKY, Barve R, Milbrandt J, Mitra RD. Single-Cell RNA-  
1004 Seq Uncovers a Robust Transcriptional Response to Morphine by Glia. *Cell Rep*. 2018;24:

- 1005 3619-3629.e4. doi:10.1016/j.celrep.2018.08.080
- 1006 77. Murphy-Royal C, Johnston AD, Boyce AKJJ, Diaz-Castro B, Institoris A, Peringod G, et  
1007 al. Stress gates an astrocytic energy reservoir to impair synaptic plasticity. *Nat Commun.*  
1008 2020;11: 2014. doi:10.1038/s41467-020-15778-9
- 1009 78. Choi M, Ahn S, Yang EJ, Kim H, Chong YH, Kim HS. Hippocampus-based contextual  
1010 memory alters the morphological characteristics of astrocytes in the dentate gyrus. *Mol*  
1011 *Brain.* 2016;9: 72. doi:10.1186/s13041-016-0253-z
- 1012 79. Kreisel T, Frank MG, Licht T, Reshef R, Ben-Menachem-Zidon O, Baratta M V., et al.  
1013 Dynamic microglial alterations underlie stress-induced depressive-like behavior and  
1014 suppressed neurogenesis. *Mol Psychiatry.* 2014;19: 699–709. doi:10.1038/mp.2013.155
- 1015 80. Chaaya N, Jacques A, Belmer A, Beecher K, Ali SA, Chehrehasa F, et al. Contextual fear  
1016 conditioning alter microglia number and morphology in the rat dorsal hippocampus. *Front*  
1017 *Cell Neurosci.* 2019;13: 214. doi:10.3389/fncel.2019.00214
- 1018 81. Tynan RJ, Naicker S, Hinwood M, Nalivaiko E, Buller KM, Pow D V., et al. Chronic  
1019 stress alters the density and morphology of microglia in a subset of stress-responsive brain  
1020 regions. *Brain Behav Immun.* 2010;24: 1058–1068. doi:10.1016/j.bbi.2010.02.001
- 1021 82. Koyanagi S, Kusunose N, Taniguchi M, Akamine T, Kanado Y, Ozono Y, et al.  
1022 Glucocorticoid regulation of ATP release from spinal astrocytes underlies diurnal  
1023 exacerbation of neuropathic mechanical allodynia. *Nat Commun.* 2016;7.  
1024 doi:10.1038/ncomms13102
- 1025 83. Hinwood M, Morandini J, Day TA, Walker FR. Evidence that microglia mediate the  
1026 neurobiological effects of chronic psychological stress on the medial prefrontal cortex.  
1027 *Cereb Cortex.* 2012;22: 1442–54. doi:10.1093/cercor/bhr229
- 1028 84. Czéh B, Simon M, Schmelting B, Hiemke C, Fuchs E. Astroglial plasticity in the  
1029 hippocampus is affected by chronic psychosocial stress and concomitant fluoxetine  
1030 treatment. *Neuropsychopharmacology.* 2006;31: 1616–1626. doi:10.1038/sj.npp.1300982
- 1031 85. Tertilt M, Skupio U, Barut J, Dubovyk V, Wawrzczak-Bargiela A, Soltys Z, et al.  
1032 Glucocorticoid receptor signaling in astrocytes is required for aversive memory formation.  
1033 *Transl Psychiatry.* 2018;8: 255. doi:10.1038/s41398-018-0300-x
- 1034 86. Liston C, Cichon JM, Jeanneteau F, Jia Z, Chao M V., Gan WB. Circadian glucocorticoid  
1035 oscillations promote learning-dependent synapse formation and maintenance. *Nat*  
1036 *Neurosci.* 2013;16: 698–705. doi:10.1038/nn.3387
- 1037 87. Sacks O, Shulman M. Steroid dementia: an overlooked diagnosis?[see  
1038 comment][summary for patients in *Neurology.* 2005 Feb 22;64(4):E18-9; PMID:  
1039 15728273]. *Neurology.* 2005;64: 707–709.
- 1040 88. Warrington TP, Bostwick JM. Psychiatric adverse effects of corticosteroids. *Mayo Clinic*  
1041 *Proceedings.* Elsevier Ltd; 2006. pp. 1361–1367. doi:10.4065/81.10.1361
- 1042 89. Frank MG, Thompson BM, Watkins LR, Maier SF. Glucocorticoids mediate stress-  
1043 induced priming of microglial pro-inflammatory responses. *Brain Behav Immun.* 2012;26:  
1044 337–345. doi:10.1016/j.bbi.2011.10.005
- 1045 90. Munhoz CD, Lepsch LB, Kawamoto EM, Malta MB, De Sá Lima L, Avellar MCW, et al.  
1046 Chronic unpredictable stress exacerbates lipopolysaccharide-induced activation of nuclear  
1047 factor- $\kappa$ B in the frontal cortex and hippocampus via glucocorticoid secretion. *J Neurosci.*  
1048 2006;26: 3813–3820. doi:10.1523/JNEUROSCI.4398-05.2006
- 1049 91. Duque E de A, Munhoz CD. The Pro-inflammatory Effects of Glucocorticoids in the  
1050 Brain. *Front Endocrinol (Lausanne).* 2016;7. doi:10.3389/fendo.2016.00078

- 1051 92. Yirmiya R, Rimmerman N, Reshef R. Depression as a Microglial Disease. *Trends in*  
1052 *Neurosciences*. Elsevier Ltd; 2015. pp. 637–658. doi:10.1016/j.tins.2015.08.001
- 1053 93. Cohen S, Murphy MLM, Prather AA. Ten Surprising Facts About Stressful Life Events  
1054 and Disease Risk. *Annu Rev Psychol*. 2019;70: 577–597. doi:10.1146/annurev-psych-  
1055 010418-102857
- 1056 94. Ludwig L, Pasman JA, Nicholson T, Aybek S, David AS, Tuck S, et al. Stressful life  
1057 events and maltreatment in conversion (functional neurological) disorder: systematic  
1058 review and meta-analysis of case-control studies. *The Lancet Psychiatry*. 2018;5: 307–  
1059 320. doi:10.1016/S2215-0366(18)30051-8
- 1060 95. Hollander JA, Cory-Slechta DA, Jacka FN, Szabo ST, Guilarte TR, Bilbo SD, et al.  
1061 Beyond the looking glass: recent advances in understanding the impact of environmental  
1062 exposures on neuropsychiatric disease. *Neuropsychopharmacology*. Springer Nature;  
1063 2020. pp. 1–11. doi:10.1038/s41386-020-0648-5
- 1064 96. Wilson RS, Arnold SE, Schneider JA, Kelly JF, Tang Y, Bennett DA. Chronic  
1065 psychological distress and risk of Alzheimer’s disease in old age. *Neuroepidemiology*.  
1066 2006;27: 143–153. doi:10.1159/000095761
- 1067 97. Ouanes S, Popp J. High Cortisol and the Risk of Dementia and Alzheimer’s Disease: A  
1068 Review of the Literature. *Front Aging Neurosci*. 2019;11. doi:10.3389/fnagi.2019.00043
- 1069 98. Bisht K, Sharma K, Tremblay ME. Chronic stress as a risk factor for Alzheimer’s disease:  
1070 Roles of microglia-mediated synaptic remodeling, inflammation, and oxidative stress.  
1071 *Neurobiology of Stress*. Elsevier Inc; 2018. pp. 9–21. doi:10.1016/j.ynstr.2018.05.003
- 1072 99. Van Os J, Kenis G, Rutten BPF. The environment and schizophrenia. *Nature*. 2010. pp.  
1073 203–212. doi:10.1038/nature09563
- 1074 100. Stankiewicz AM, Goscik J, Majewska A, Swiergiel AH, Juszczak GR. The Effect of  
1075 Acute and Chronic Social Stress on the Hippocampal Transcriptome in Mice. Colombo  
1076 GI, editor. *PLoS One*. 2015;10: e0142195. doi:10.1371/journal.pone.0142195
- 1077 101. O’Meara RW, Ryan SD, Colognato H, Kothary R. Derivation of enriched oligodendrocyte  
1078 cultures and oligodendrocyte/neuron myelinating co-cultures from post-natal murine  
1079 tissues. *J Vis Exp*. 2011. doi:10.3791/3324
- 1080 102. Sutherland BW, Toews J, Kast J. Utility of formaldehyde cross-linking and mass  
1081 spectrometry in the study of protein-protein interactions. *Journal of Mass Spectrometry*. J  
1082 *Mass Spectrom*; 2008. pp. 699–715. doi:10.1002/jms.1415
- 1083 103. Cheng J, Blum R, Bowman C, Hu D, Shilatfard A, Shen S, et al. A role for H3K4  
1084 monomethylation in gene repression and partitioning of chromatin readers. *Mol Cell*.  
1085 2014;53: 979–992. doi:10.1016/j.molcel.2014.02.032
- 1086 104. Bolger AM, Lohse M, Usadel B. Trimmomatic: a flexible trimmer for Illumina sequence  
1087 data. *Bioinformatics*. 2014;30: 2114–2120. doi:10.1093/bioinformatics/btu170
- 1088 105. Kim D, Langmead B, Salzberg SL. HISAT: A fast spliced aligner with low memory  
1089 requirements. *Nat Methods*. 2015;12: 357–360. doi:10.1038/nmeth.3317
- 1090 106. Li H, Handsaker B, Wysoker A, Fennell T, Ruan J, Homer N, et al. The Sequence  
1091 Alignment/Map format and SAMtools. *Bioinformatics*. 2009;25: 2078–2079.  
1092 doi:10.1093/bioinformatics/btp352
- 1093 107. Liao Y, Smyth GK, Shi W. featureCounts: an efficient general purpose program for  
1094 assigning sequence reads to genomic features. *Bioinformatics*. 2013;30: 923–930.  
1095 doi:10.1093/bioinformatics/btt656
- 1096 108. Love MI, Huber W, Anders S. Moderated estimation of fold change and dispersion for

- 1097 RNA-seq data with DESeq2. *Genome Biol.* 2014;15: 550. doi:10.1186/s13059-014-0550-  
1098 8
- 1099 109. Ramírez F, Dündar F, Diehl S, Grüning BA, Manke T. deepTools: a flexible platform for  
1100 exploring deep-sequencing data. *Nucleic Acids Res.* 2014;42: W187–W191.  
1101 doi:10.1093/nar/gku365
- 1102 110. Robinson JT, Thorvaldsdóttir H, Winckler W, Guttman M, Lander ES, Getz G, et al.  
1103 Integrative genomics viewer. *Nature Biotechnology.* Nature Publishing Group; 2011. pp.  
1104 24–26. doi:10.1038/nbt.1754
- 1105 111. Langmead B, Salzberg SL. Fast gapped-read alignment with Bowtie 2. *Nat Methods.*  
1106 2012;9: 357–359. doi:10.1038/nmeth.1923
- 1107 112. Feng J, Liu T, Qin B, Zhang Y, Liu XS. Identifying ChIP-seq enrichment using MACS.  
1108 *Nat Protoc.* 2012;7: 1728–1740. doi:10.1038/nprot.2012.101
- 1109 113. Quinlan AR, Hall IM. BEDTools: a flexible suite of utilities for comparing genomic  
1110 features. *Bioinformatics.* 2010;26: 841–842. doi:10.1093/bioinformatics/btq033
- 1111 114. Kuhn RM, Haussler D, Kent WJ. The UCSC genome browser and associated tools. *Brief*  
1112 *Bioinform.* 2012;14: 144–161. doi:10.1093/bib/bbs038
- 1113 115. Nicolae DL, Gamazon E, Zhang W, Duan S, Dolan ME, Cox NJ. Trait-Associated SNPs  
1114 Are More Likely to Be eQTLs: Annotation to Enhance Discovery from GWAS. Gibson G,  
1115 editor. *PLoS Genet.* 2010;6: e1000888. doi:10.1371/journal.pgen.1000888
- 1116 116. Yu G. Gene ontology semantic similarity analysis using GOSemSim. *Methods in*  
1117 *Molecular Biology.* Humana Press Inc.; 2020. pp. 207–215. doi:10.1007/978-1-0716-  
1118 0301-7\_11
- 1119 117. Yu G, Wang L-G, Yan G-R, He Q-Y. DOSE: an R/Bioconductor package for disease  
1120 ontology semantic and enrichment analysis. *Bioinformatics.* 2014;31: 608–609.  
1121 doi:10.1093/bioinformatics/btu684
- 1122 118. Durinck S, Spellman PT, Birney E, Huber W. Mapping identifiers for the integration of  
1123 genomic datasets with the R/ Bioconductor package biomaRt. *Nat Protoc.* 2009;4: 1184–  
1124 1191. doi:10.1038/nprot.2009.97
- 1125 119. Kulakovskiy I V, Vorontsov IE, Yevshin IS, Sharipov RN, Fedorova AD, Rumynskiy EI,  
1126 et al. HOCOMOCO: towards a complete collection of transcription factor binding models  
1127 for human and mouse via large-scale ChIP-Seq analysis. *Nucleic Acids Res.* 2017;46:  
1128 D252–D259. doi:10.1093/nar/gkx1106
- 1129 120. Grant CE, Bailey TL, Noble WS. FIMO: scanning for occurrences of a given motif.  
1130 *Bioinformatics.* 2011;27: 1017–1018. doi:10.1093/bioinformatics/btr064
- 1131 121. Bailey TL, Boden M, Buske FA, Frith M, Grant CE, Clementi L, et al. MEME Suite: tools  
1132 for motif discovery and searching. *Nucleic Acids Res.* 2009;37: W202–W208.  
1133 doi:10.1093/nar/gkp335
- 1134 122. McLean CY, Bristor D, Hiller M, Clarke SL, Schaar BT, Lowe CB, et al. GREAT  
1135 improves functional interpretation of cis-regulatory regions. *Nat Biotechnol.* 2010;28:  
1136 495–501. doi:10.1038/nbt.1630
- 1137

## 1138 Supporting Information

1139

1140 **S1 Table. Sequence of primers.**

1141

1142 **S2 Table. Genome-wide called  $\gamma$ H2AX peaks.**

1143

1144 **S3 Table. Nuclear RNA-Seq analysis.**

1145

1146 **S4 Table. Glucocorticoid receptor binding sites.**

1147

1148 **Figure S1.  $\gamma$ H2AX ChIP-Seq.**

1149 (A) qRT-PCR analysis of *Npas4* and *Arc* mRNA expression in the hippocampus (HIP) and  
1150 medial prefrontal cortex (mPFC) 30 minutes following contextual fear conditioning (CFC30'),  
1151 normalized to *Hprt* and respective naive condition. N = 4 mice per group; two-tailed unpaired  
1152 student's t-test; \* P  $\leq$  0.05; \*\* P  $\leq$  0.01; \*\*\* P  $\leq$  0.001; \*\*\*\* P  $<$  0.0001; Mean  $\pm$  SEM. (B)  
1153 Volcano plots of Log<sub>2</sub>FC versus Log<sub>10</sub>(FDR) of  $\gamma$ H2AX peaks and their corresponding genes  
1154 for HIP (left) and mPFC (right). Upregulated indicates FDR  $<$  0.05 and log<sub>2</sub>FC  $>$  0,  
1155 Downregulated indicates FDR  $<$  0.05 and log<sub>2</sub>FC  $<$  0, ns indicates FDR  $>$  0.05. (C) Correlation  
1156 between gene length and  $\gamma$ H2AX peak length with linear regression. Left is HIP, right is mPFC.  
1157 (D) Enrichment map of the 27 enriched biological processes for the 206  $\gamma$ H2AX peak-containing  
1158 genes shared between HIP and mPFC in Fig 1A. Over-representation analysis with gene  
1159 ontology (GO) category "Biological Process." (E) Hippocampal  $\gamma$ H2AX ChIP-qPCR analysis at  
1160 the gene bodies of early response genes *Npas4*, *Nr4a1*, and housekeeping gene *B2M*. Each  
1161 replicate was generated from the pooling of 3 animals' hippocampi. N = 3; IgG N=2; two-tailed  
1162 unpaired student's t-test; ns P  $>$  0.05; \* P  $\leq$  0.05; \*\* P  $\leq$  0.01; Mean  $\pm$  SEM.

1163

1164 **Figure S2. Extraction of enriched NeuN+ and NeuN- nuclei from mouse brain**

1165 (A) Flow cytometry dot-plots representative of the gating strategy used for isolating neuronal  
1166 and non-neuronal nuclei from mouse brain for RNA-Seq. Appropriately sized (FSC vs SSC),  
1167 singlet nuclei (DAPI+), were gated for the presence or absence of the neuronal nuclei marker  
1168 NeuN (NeuN+). (B) qRT-PCR analysis of pre-mRNA transcription from the neuronal early  
1169 response gene *Npas4* and mRNA for the early response gene *Arc*. RNA purified from FACS-  
1170 isolated nuclei or whole mPFC homogenate after CFC. cDNA was primed with random  
1171 hexamers and the primer used for qPCR was either intronic (*Npas4*) or spanned an exon-exon  
1172 junction (*Arc*). Normalized to *Hprt* and relative to naive NeuN+ for *Npas4* or normalized to  
1173 respective naive condition for *Arc*. N = 3-4 mice per group; One-way ANOVA with Tukey's  
1174 multiple comparisons test; absence of an asterisk indicates P  $>$  0.05; \* P  $\leq$  0.05; \*\* P  $\leq$  0.01; \*\*\*  
1175 P  $\leq$  0.001; \*\*\*\* P  $<$  0.0001; Mean  $\pm$  SEM.

1176

1177 **Figure S3. Nuclear RNA-Seq after contextual fear conditioning.**

1178 (A) Correspondence between RNA-Seq datasets and brain cell types. Marker gene sets for brain  
1179 cell types was obtained from a previously published dataset [28], and the average expression of  
1180 these genes was calculated (RPKM geometric mean) for the naive conditions. Z-score  
1181 determined by row. (B-E) Volcano plots of Log<sub>2</sub>FC versus log<sub>10</sub>(FDR) of RNA-Seq from HIP  
1182 NeuN- (A), HIP NeuN+ (B), mPFC NeuN- (C), and mPFC NeuN+ (D). Up-regulated indicates

1183 FDR < 0.05 and log<sub>2</sub>(FC) > 0, Down-regulated indicates FDR < 0.05 and log<sub>2</sub>(FC) < 0, ns  
1184 indicates FDR > 0.05. (F-G) Number of upregulated genes in neuronal (F) and non-neuronal (G)  
1185 nuclei 10 to 30 minutes following CFC (RNA-Seq; FDR < 0.05). Genes shared between HIP and  
1186 mPFC are in grey (CFC10') and light grey (CFC30').

1187  
1188 **Figure S4. Brain  $\gamma$ H2AX corresponds with rapid gene induction and expression level.**

1189 (A) Percent overlap between genes containing a  $\gamma$ H2AX peak and those genes upregulated (padj  
1190 < 0.05) in non-neuronal nuclei after CFC. Hypergeometric distribution test; \*\*\* P  $\leq$  0.001; \*\*\*\*  
1191 P < 0.0001. (B) DSBs increase with RNA expression level; mPFC CFC30  $\gamma$ H2AX ChIP-Seq  
1192 intensity at gene bodies versus percentile of mPFC NeuN+ CFC30' RNA expression. Welch's  
1193 ANOVA with Games-Howell post-hoc test. (C) Confirming equivalent RNA expression levels  
1194 between the observed (upregulated) genes and expected (randomly sampled) genes for the  
1195 permutation testing. Distribution of mean RNA FPKM for 1000 permutations of random  
1196 sampling, binned by RNA expression level. Lines are the mean RNA FPKM. mPFC 10 minutes  
1197 after CFC (left), or 30 minutes after CFC (right).

1198  
1199 **Figure S5. RNA-Seq promoter-enriched motifs in neurons.**

1200 (A-B) Top 10 enriched promoter motifs for the genes upregulated in NeuN+ CFC10' HIP (A)  
1201 and NeuN+ CFC10' mPFC (B). Using the "Transcription Factor Targets" (TFT) gene set from  
1202 the molecular signatures database (MSigDB). (C) Top 8 enriched promoter motifs for the genes  
1203 upregulated in neuronal nuclei from HIP 30 minutes after CFC (Log<sub>2</sub>FC > 0 & FDR < 0.05).  
1204 Using the "Transcription Factor Targets" (TFT) gene set from the molecular signatures database  
1205 (MSigDB). (D) Motifs associated with upregulated genes in HIP NeuN+ nuclei. Left, number of  
1206 the indicated motifs associated with each gene's promoter. Center,  $\gamma$ H2AX Log<sub>2</sub>FC, right, RNA-  
1207 Seq Log<sub>2</sub> fold change 10 or 30 minutes after CFC. Using the TFT gene sets from MSigDB for  
1208 each transcription factor motif.

1209  
1210 **Figure S6.  $\gamma$ H2AX peaks are not enriched at late response genes.**

1211 Differentially regulated genes from visual cortex single-cell RNA-Seq that also contain  $\gamma$ H2AX  
1212 peaks in mPFC (right), and their regulation in mPFC nuclear RNA-Seq (left). 'Neuron'  
1213 encompasses excitatory and inhibitory neuron subtypes, 'Glia' includes all subtypes from  
1214 oligodendrocytes, microglia, astrocytes, and oligodendrocyte precursor cells, while 'Vasculature'  
1215 denotes endothelial, pericyte, and smooth muscle cell subtypes [42].

1216  
1217 **Fig S7. CFC induces early response genes in non-neuronal nuclei.**

1218 (A) Motifs associated with upregulated genes in non-neuronal nuclei from HIP (top) or mPFC  
1219 (bottom). Left, number of the indicated motifs associated with each gene's promoter. Center,  
1220  $\gamma$ H2AX Log<sub>2</sub>FC, right, RNA-Seq Log<sub>2</sub> fold change 10 or 30 minutes after CFC. Using the TFT  
1221 gene sets from MSigDB for each transcription factor motif. (B-C) Enrichment map of the top  
1222 enriched biological processes for the genes upregulated in HIP NeuN- (B) or mPFC NeuN- (C)  
1223 nuclei 30 minutes after CFC. Over-representation analysis with gene ontology (GO) category  
1224 "Biological Process."

1225  
1226 **Fig S8. Increased HSF1 activity following CFC.**

1227 (A) HSF1 binding increases at the promoter regions of chaperones *Hsp90ab1* and *Hspa8*. *Actb*,  
1228 which is not a HSF1 target but has similarly increased levels of  $\gamma$ H2AX and gene expression

1229 showed lower HSF1 binding. ChIP-qPCR of cortex 30 minutes following CFC. N=6-7; One-way  
1230 ANOVA with Tukey's multiple comparisons test; ns  $P > 0.05$ ; \*  $P \leq 0.05$ ; \*\*  $P \leq 0.01$ ; \*\*\*  $P \leq$   
1231 0.001; Mean  $\pm$  SEM. (B) Increased HSF1 nuclear translocation in neurons and non-neurons after  
1232 CFC in cortex. Top, representative fluorescence intensity histograms after CFC (naïve, grey;  
1233 CFC30, red). Bottom, intensity of nuclear HSF1 after CFC was analyzed by flow cytometry;  
1234 median fluorescence intensity (MFI) normalized to respective naive condition. N = 7; two-tailed  
1235 unpaired student's t-test; \*\*  $P \leq 0.01$ ; \*\*\*  $P \leq 0.001$ ; Mean  $\pm$  SEM.

1236

1237 **Fig S9. Related to Fig 4.**

1238 (A) qRT-PCR analysis of *Sgk1* and *Ddit4* mRNA expression in the HIP and mPFC 30 minutes  
1239 following contextual fear conditioning - normalized to *Hprt* and respective naive condition. N =  
1240 4 mice per group; two-tailed unpaired student's t-test; \*\* $P \leq 0.01$ ; Mean  $\pm$  SEM. (B) ChIP-qPCR  
1241 analysis of  $\gamma$ H2AX induction at select gene bodies in mouse glial primary cultures 30 minutes  
1242 after treatment with dexamethasone (Dex) (100nM). N = 4 independent cultures; two-tailed  
1243 unpaired student's t-test; ns  $P > 0.05$ ; Mean  $\pm$  SEM. (C) Average H3K27ac signal of prefrontal  
1244 anterior cingulate cortex (ACC) at glucocorticoid receptor binding sites (rat cortical ChIP-Seq)  
1245 [55,56] containing the GC motif in mouse (n= 5591 peaks). H3K27ac ChIP-Seq of naive mouse  
1246 ACC from NeuN+ or NeuN- isolated nuclei [57]. (D) Average H3K27ac signal at intergenic  
1247 glucocorticoid receptor binding sites (rat cortical ChIP-Seq) [55,56] containing the GC motif in  
1248 mouse (n= 1860 peaks). H3K27ac ChIP-Seq of mouse hippocampal CA1 region from NeuN+ or  
1249 NeuN- isolated nuclei 1 hour after exposure to context, or CFC (shock) [57].  
1250 (E) Mean expression of the glucocorticoid receptor (*Nr3c1*) from naive nuclear RNA-Seq  
1251 datasets. (F) Intensity of nuclear glucocorticoid receptor (left) or nuclear NeuN (right) in NeuN+  
1252 or NeuN- nuclei of the mPFC after corticosterone treatment. Normalized median fluorescence  
1253 intensity (MFI). N = 5 mice per group; two-tailed unpaired student's t-test; \*\*  $P \leq 0.01$ ; ns  $P >$   
1254 0.05; Mean  $\pm$  SEM.

1255

1256 **Fig S10. Purification and confirmation of glia cell types.**

1257 (A) Flow cytometry dot-plots representative of the gating strategy used for isolating neuronal  
1258 and glial nuclei from hippocampus for RNA-Seq. Appropriately sized (FSC vs SSC plot), singlet  
1259 nuclei (DAPI+; DNA stain), are gated for the presence or absence of the neuronal nuclei marker  
1260 NeuN (NeuN+); NeuN- nuclei are then separated by the astrocyte marker GFAP (GFAP+),  
1261 GFAP- nuclei are then gated for the microglia marker P.1 (PU.1+), with the oligodendrocyte-  
1262 enriched fraction, NeuN-/GFAP-/PU.1- (3X-), also collected. (B) RT-qPCR analysis of FACS-  
1263 isolated nuclei for cell-type-specific markers: neuronal (*Npas4*), astrocyte (*Gfap*), microglial  
1264 (*Clqa*), oligodendrocyte (*Mbp*). Normalized to *Hprt*; N = 8, 4 mice saline treated, 4 mice  
1265 corticosterone treated. (C) Glucocorticoid receptor agonist corticosterone (Cort) induces *Sgk1*,  
1266 *Ddit4*, and *Glul* in glia, and not the housekeeping gene *Actb*. RT-qPCR on FACS-purified  
1267 hippocampal nuclear RNA from neurons (NeuN+), astrocytes (GFAP+), microglia (PU.1+), and  
1268 oligodendrocytes-enriched (NeuN-GFAP-PU.1-; 3X-) 30 minutes after saline or  
1269 corticosterone:HBC complex (2mg/Kg) administration. N = 4 mice per group; two-tailed  
1270 unpaired student's t-test; \*  $P \leq 0.05$ ; \*\*\*  $P \leq 0.001$ ; \*\*\*\*  $P < 0.0001$ ; Mean  $\pm$  SEM.; \*  $P \leq 0.05$  ;  
1271 \*\*\*  $P \leq 0.001$ ; \*\*\*\*  $P < 0.0001$ .

1272

1273 **Fig S11. Extensive corticosterone-mediated gene induction in the hippocampus.**



1274 (A) Correspondence between hippocampal cell-type-specific RNA-seq datasets and brain cell  
1275 types. Marker gene sets for brain cell types was obtained from a previously published dataset,  
1276 and the average expression of these genes was calculated (RPKM geometric mean) for the saline  
1277 condition [28]. Z-score determined by row. (B-E) Volcano plots of Log<sub>2</sub>FC versus Log<sub>10</sub>(FDR)  
1278 of RNA-Seq from corticosterone treated hippocampal cell types. Upregulated indicates FDR <  
1279 0.05 and log<sub>2</sub>(FC) > 0, Downregulated indicates FDR < 0.05 and log<sub>2</sub>(FC) < 0, ns indicates FDR  
1280 > 0.05.

1281

1282 **Fig S12. Corticosterone induced biological process GO terms**

1283 (A-C) Enrichment map of the top 30 enriched biological processes for the genes upregulated in  
1284 HIP after corticosterone treatment in astrocyte (A), oligodendrocyte-enriched (B), and microglia  
1285 (C) nuclei. No enrichment in neurons. Over-representation analysis with gene ontology (GO)  
1286 category “Biological Process.”

1287

1288 **Fig S13. Corticosterone repressed biological process GO terms**

1289 (A-C) Enrichment map of the top enriched biological processes for the genes downregulated in  
1290 HIP after corticosterone treatment in astrocytic (A), oligodendrocyte-enriched (B), and  
1291 microglial (C) nuclei. Over-representation analysis with gene ontology (GO) category  
1292 “Biological Process.” (D) Top five enriched biological processes of the downregulated genes for  
1293 each cell type in purified hippocampal nuclei from neurons, astrocytes, microglia, and  
1294 oligodendrocyte-enriched after corticosterone treatment (padj < 0.05). Over-representation  
1295 analysis with gene ontology (GO) category “Biological Process.”

1296

1297 **Fig S14.  $\gamma$ H2AX peak at site of convergent transcription within gene *Polr3e*.**

1298 Genome browser tracks for the gene *Polr3e* displaying a small (951bp) intronic  $\gamma$ H2AX peak in  
1299 mPFC overlapping a mammalian interspersed repeat (MIR). MIR antisense transcription is  
1300 shown on the negative strand (-).

1301

1302 **Fig S15. Enriched disease associations after corticosterone treatment**

1303 Enriched disease associations for the genes upregulated in HIP after corticosterone treatment in  
1304 neuronal, astrocytic, microglial, and oligodendrocyte-enriched nuclei, filtered for disease  
1305 associations related to the nervous system. An absent group indicates no enrichment at threshold  
1306  $q < 0.05$ . Over-representation analysis with DOSE Disease ontology.

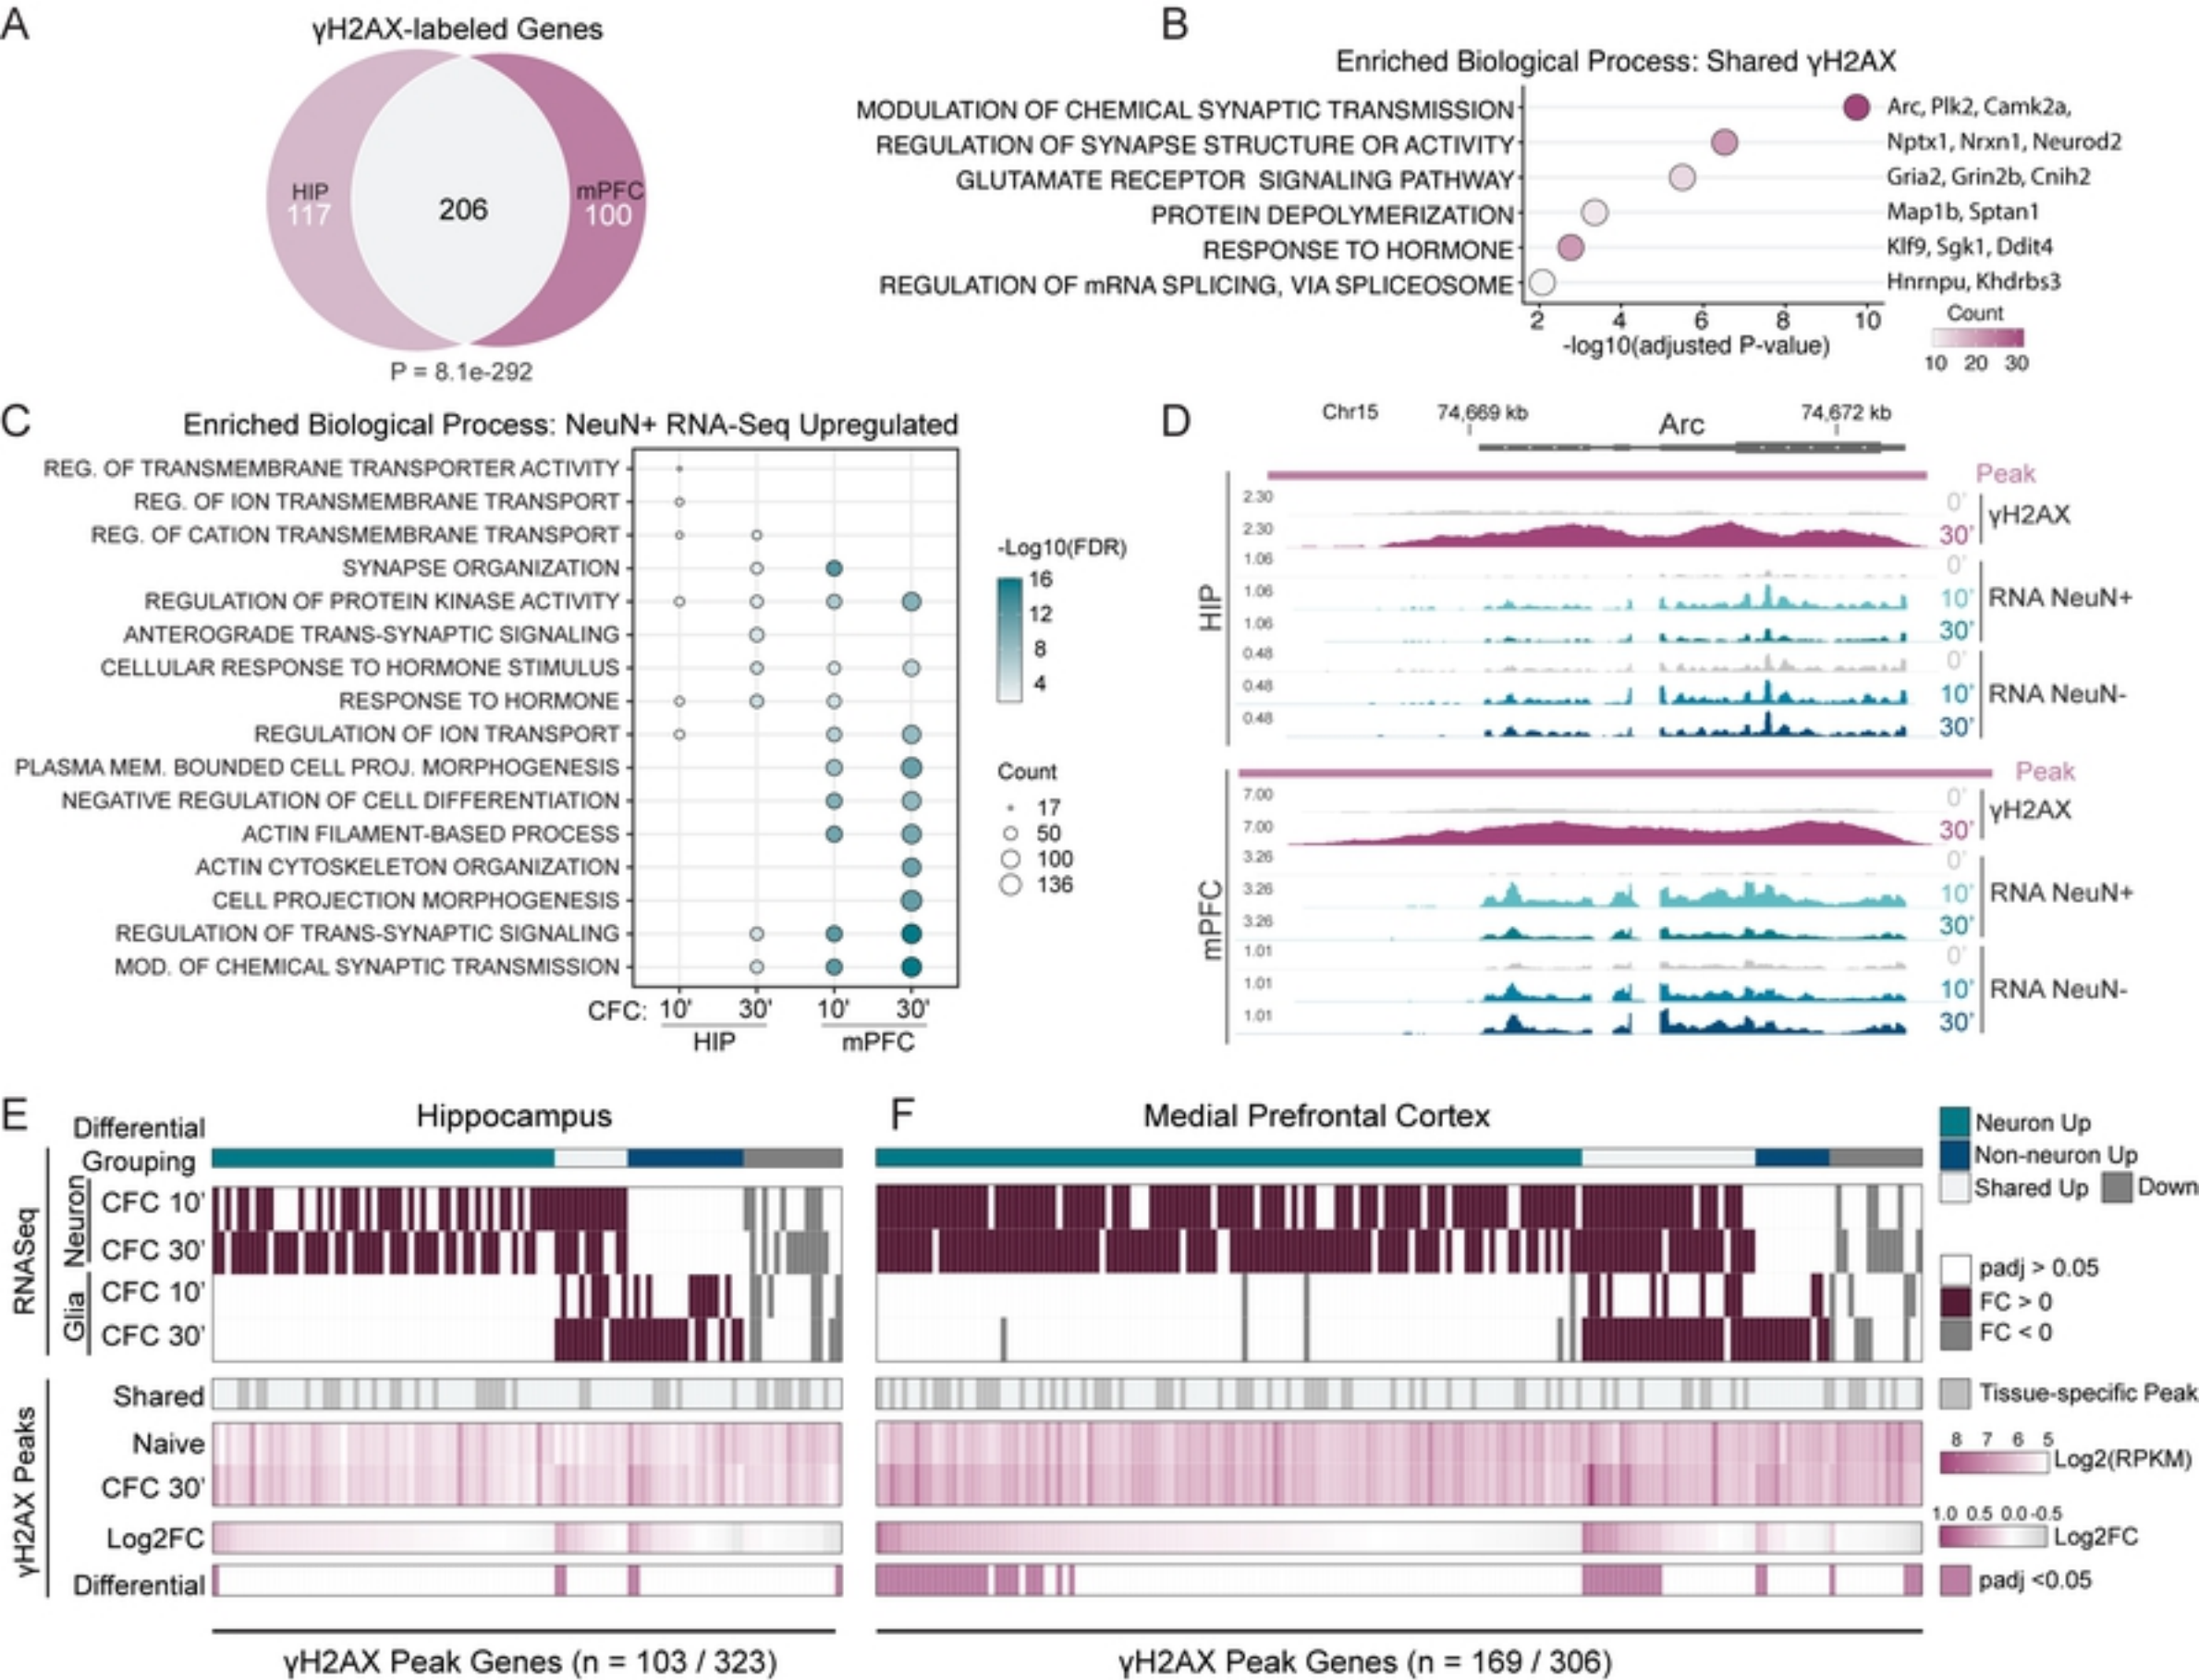

Figure 1

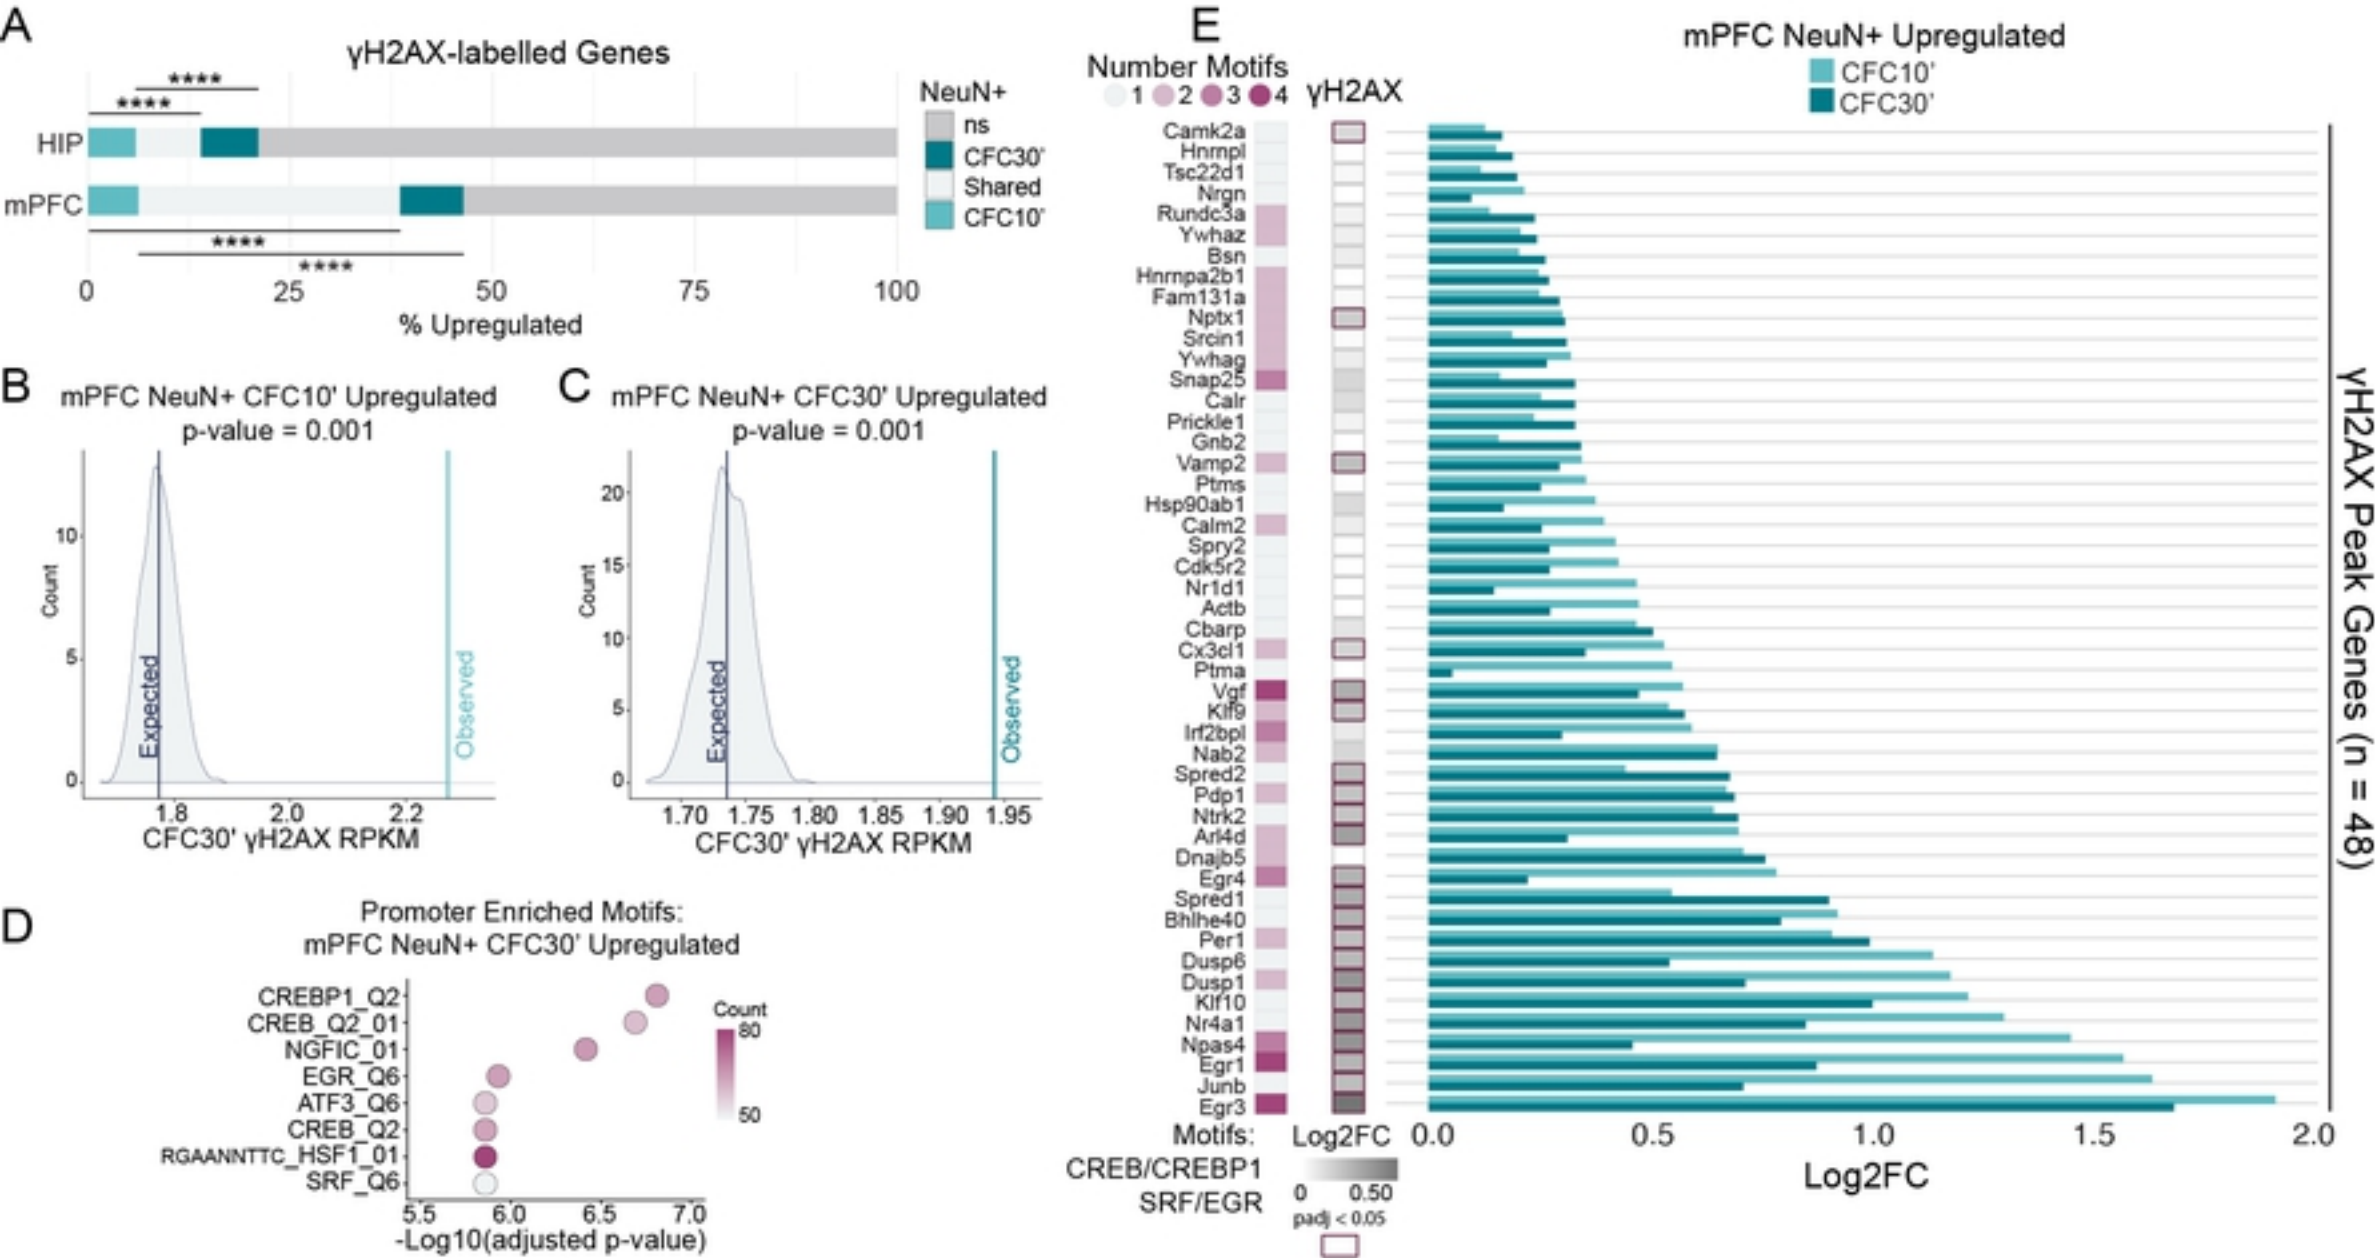

Figure 2

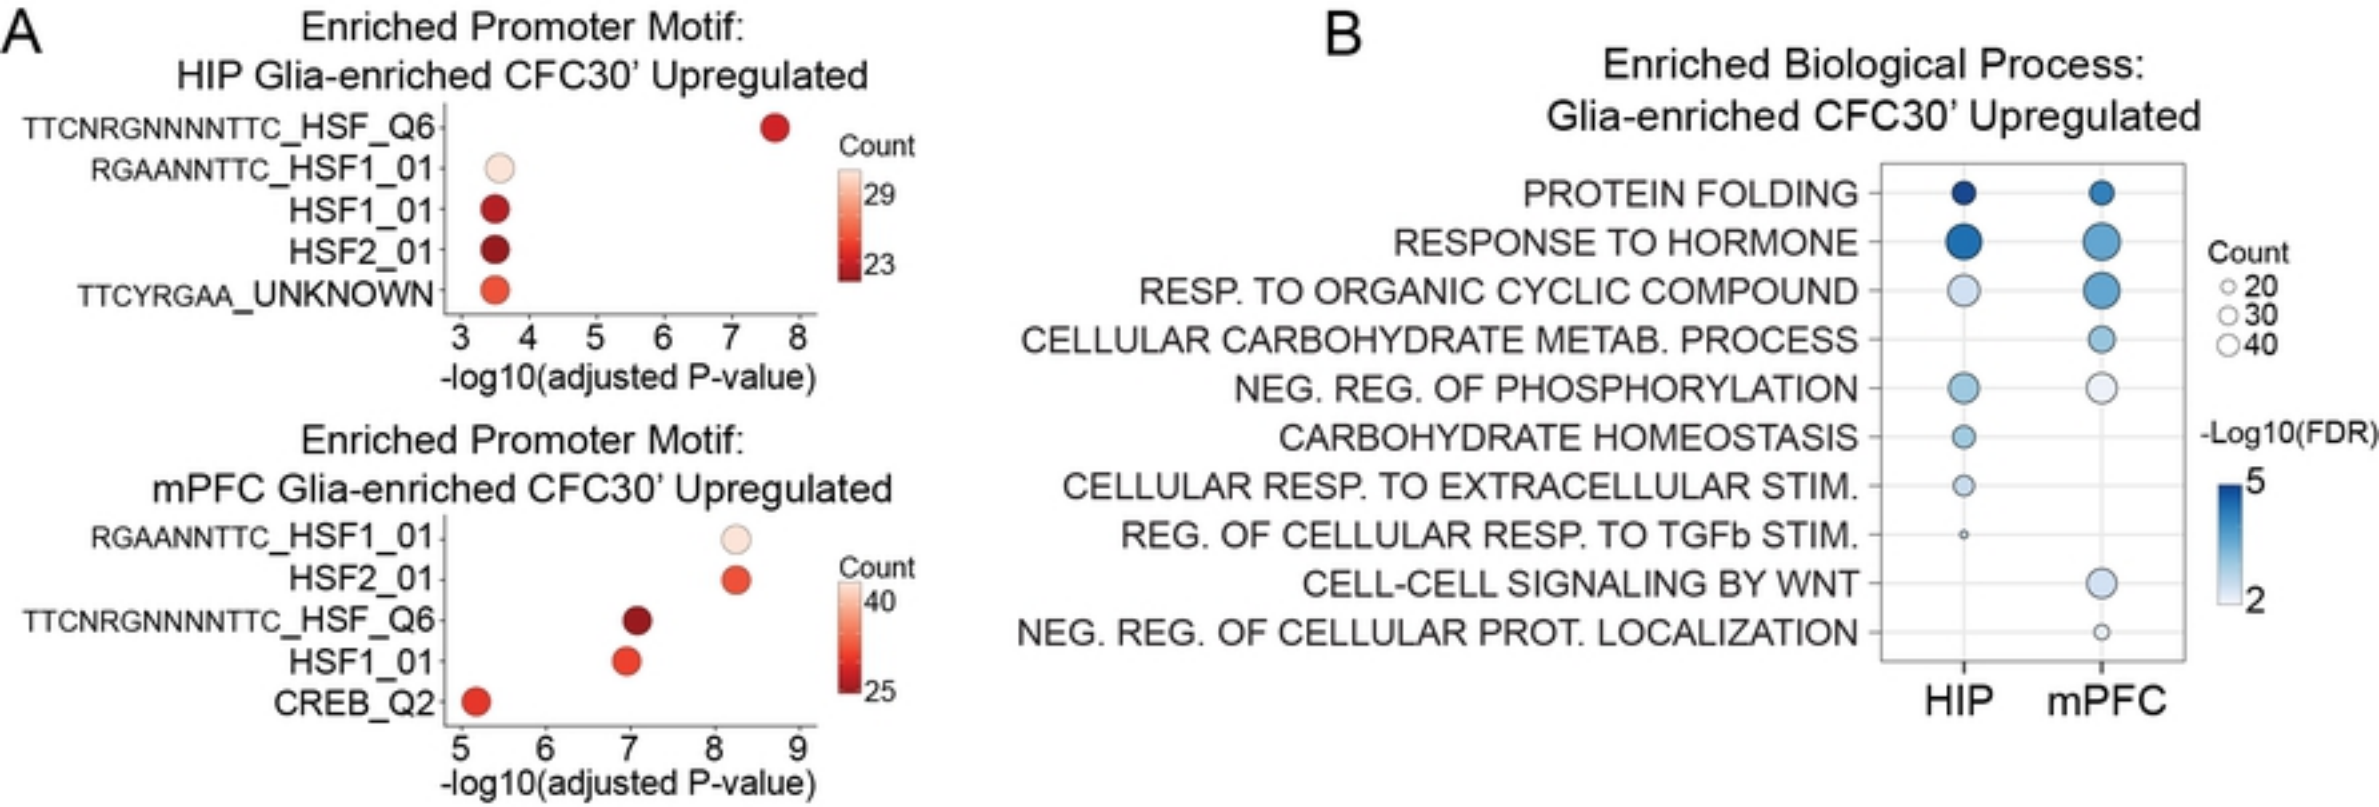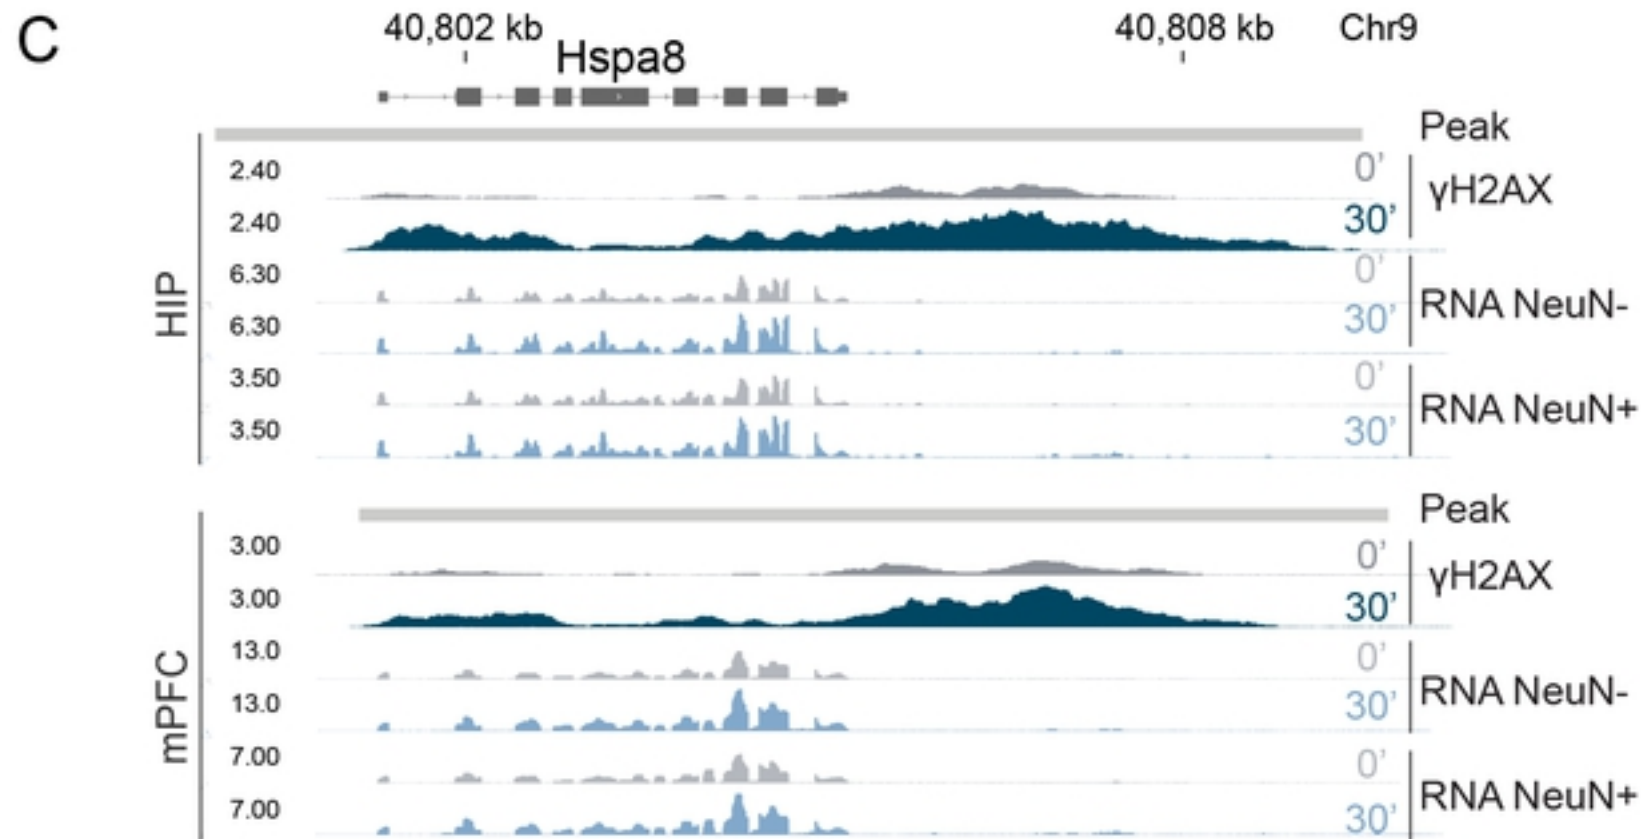

Figure 3

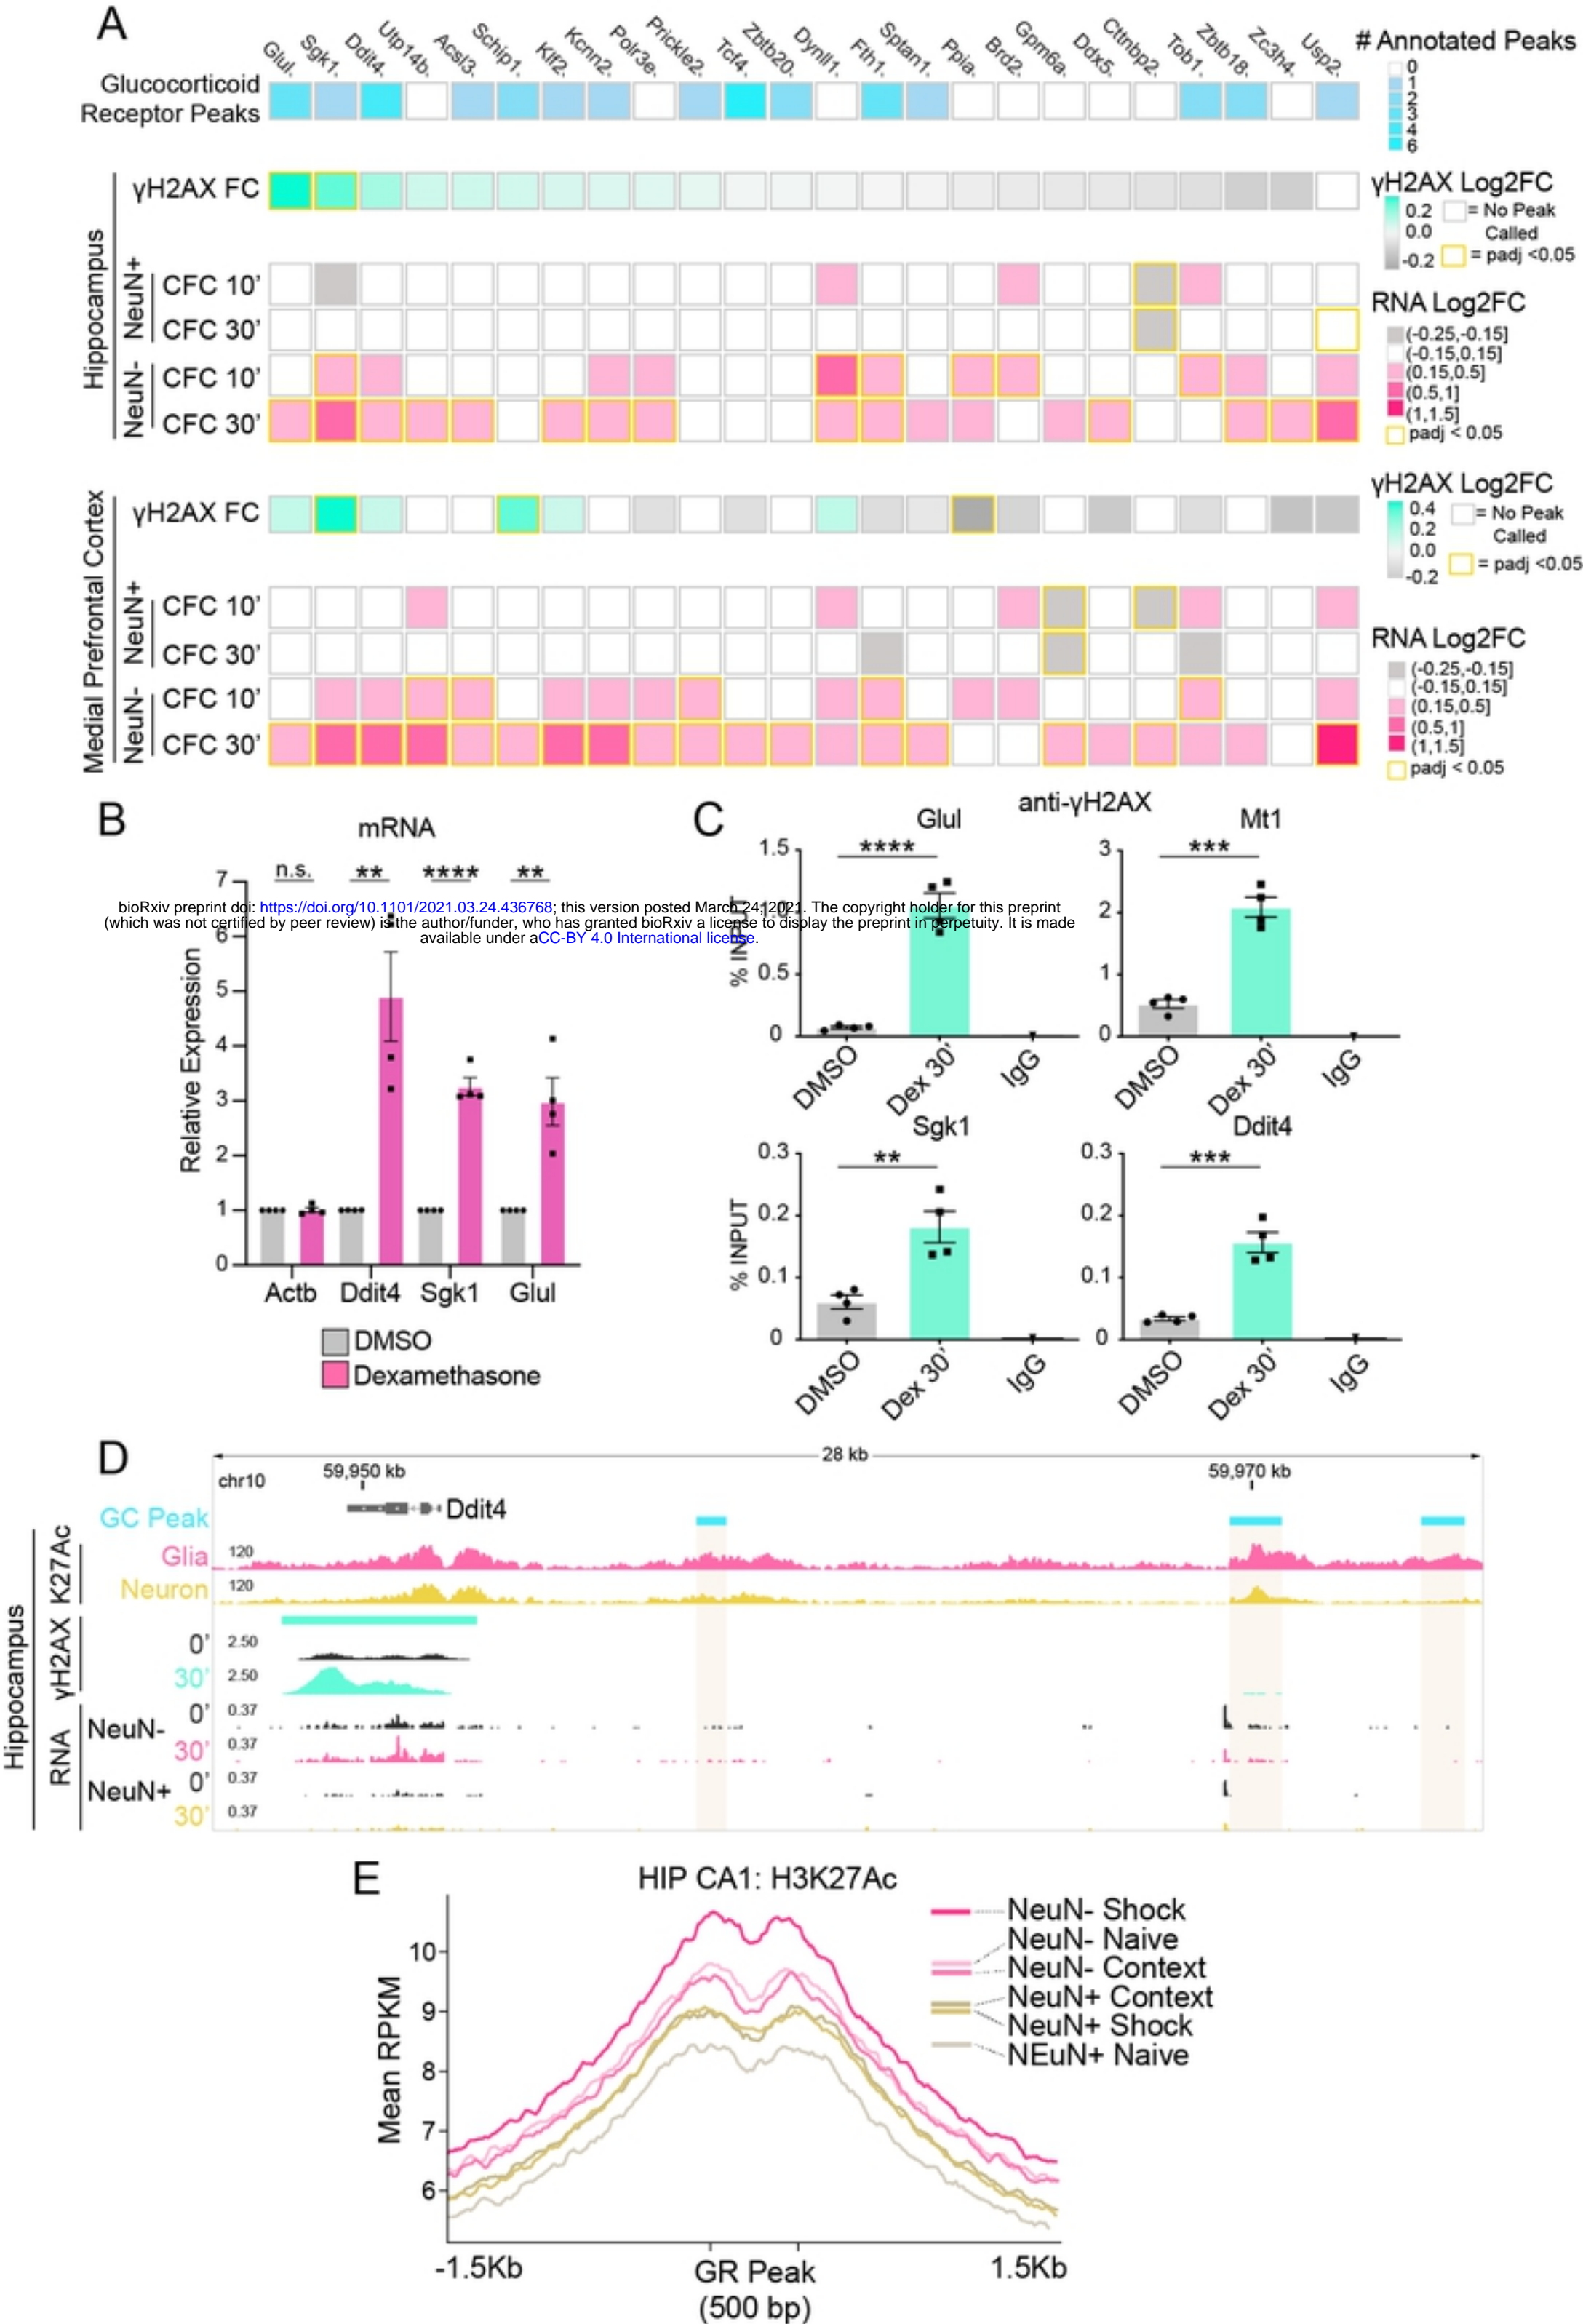

Figure 4

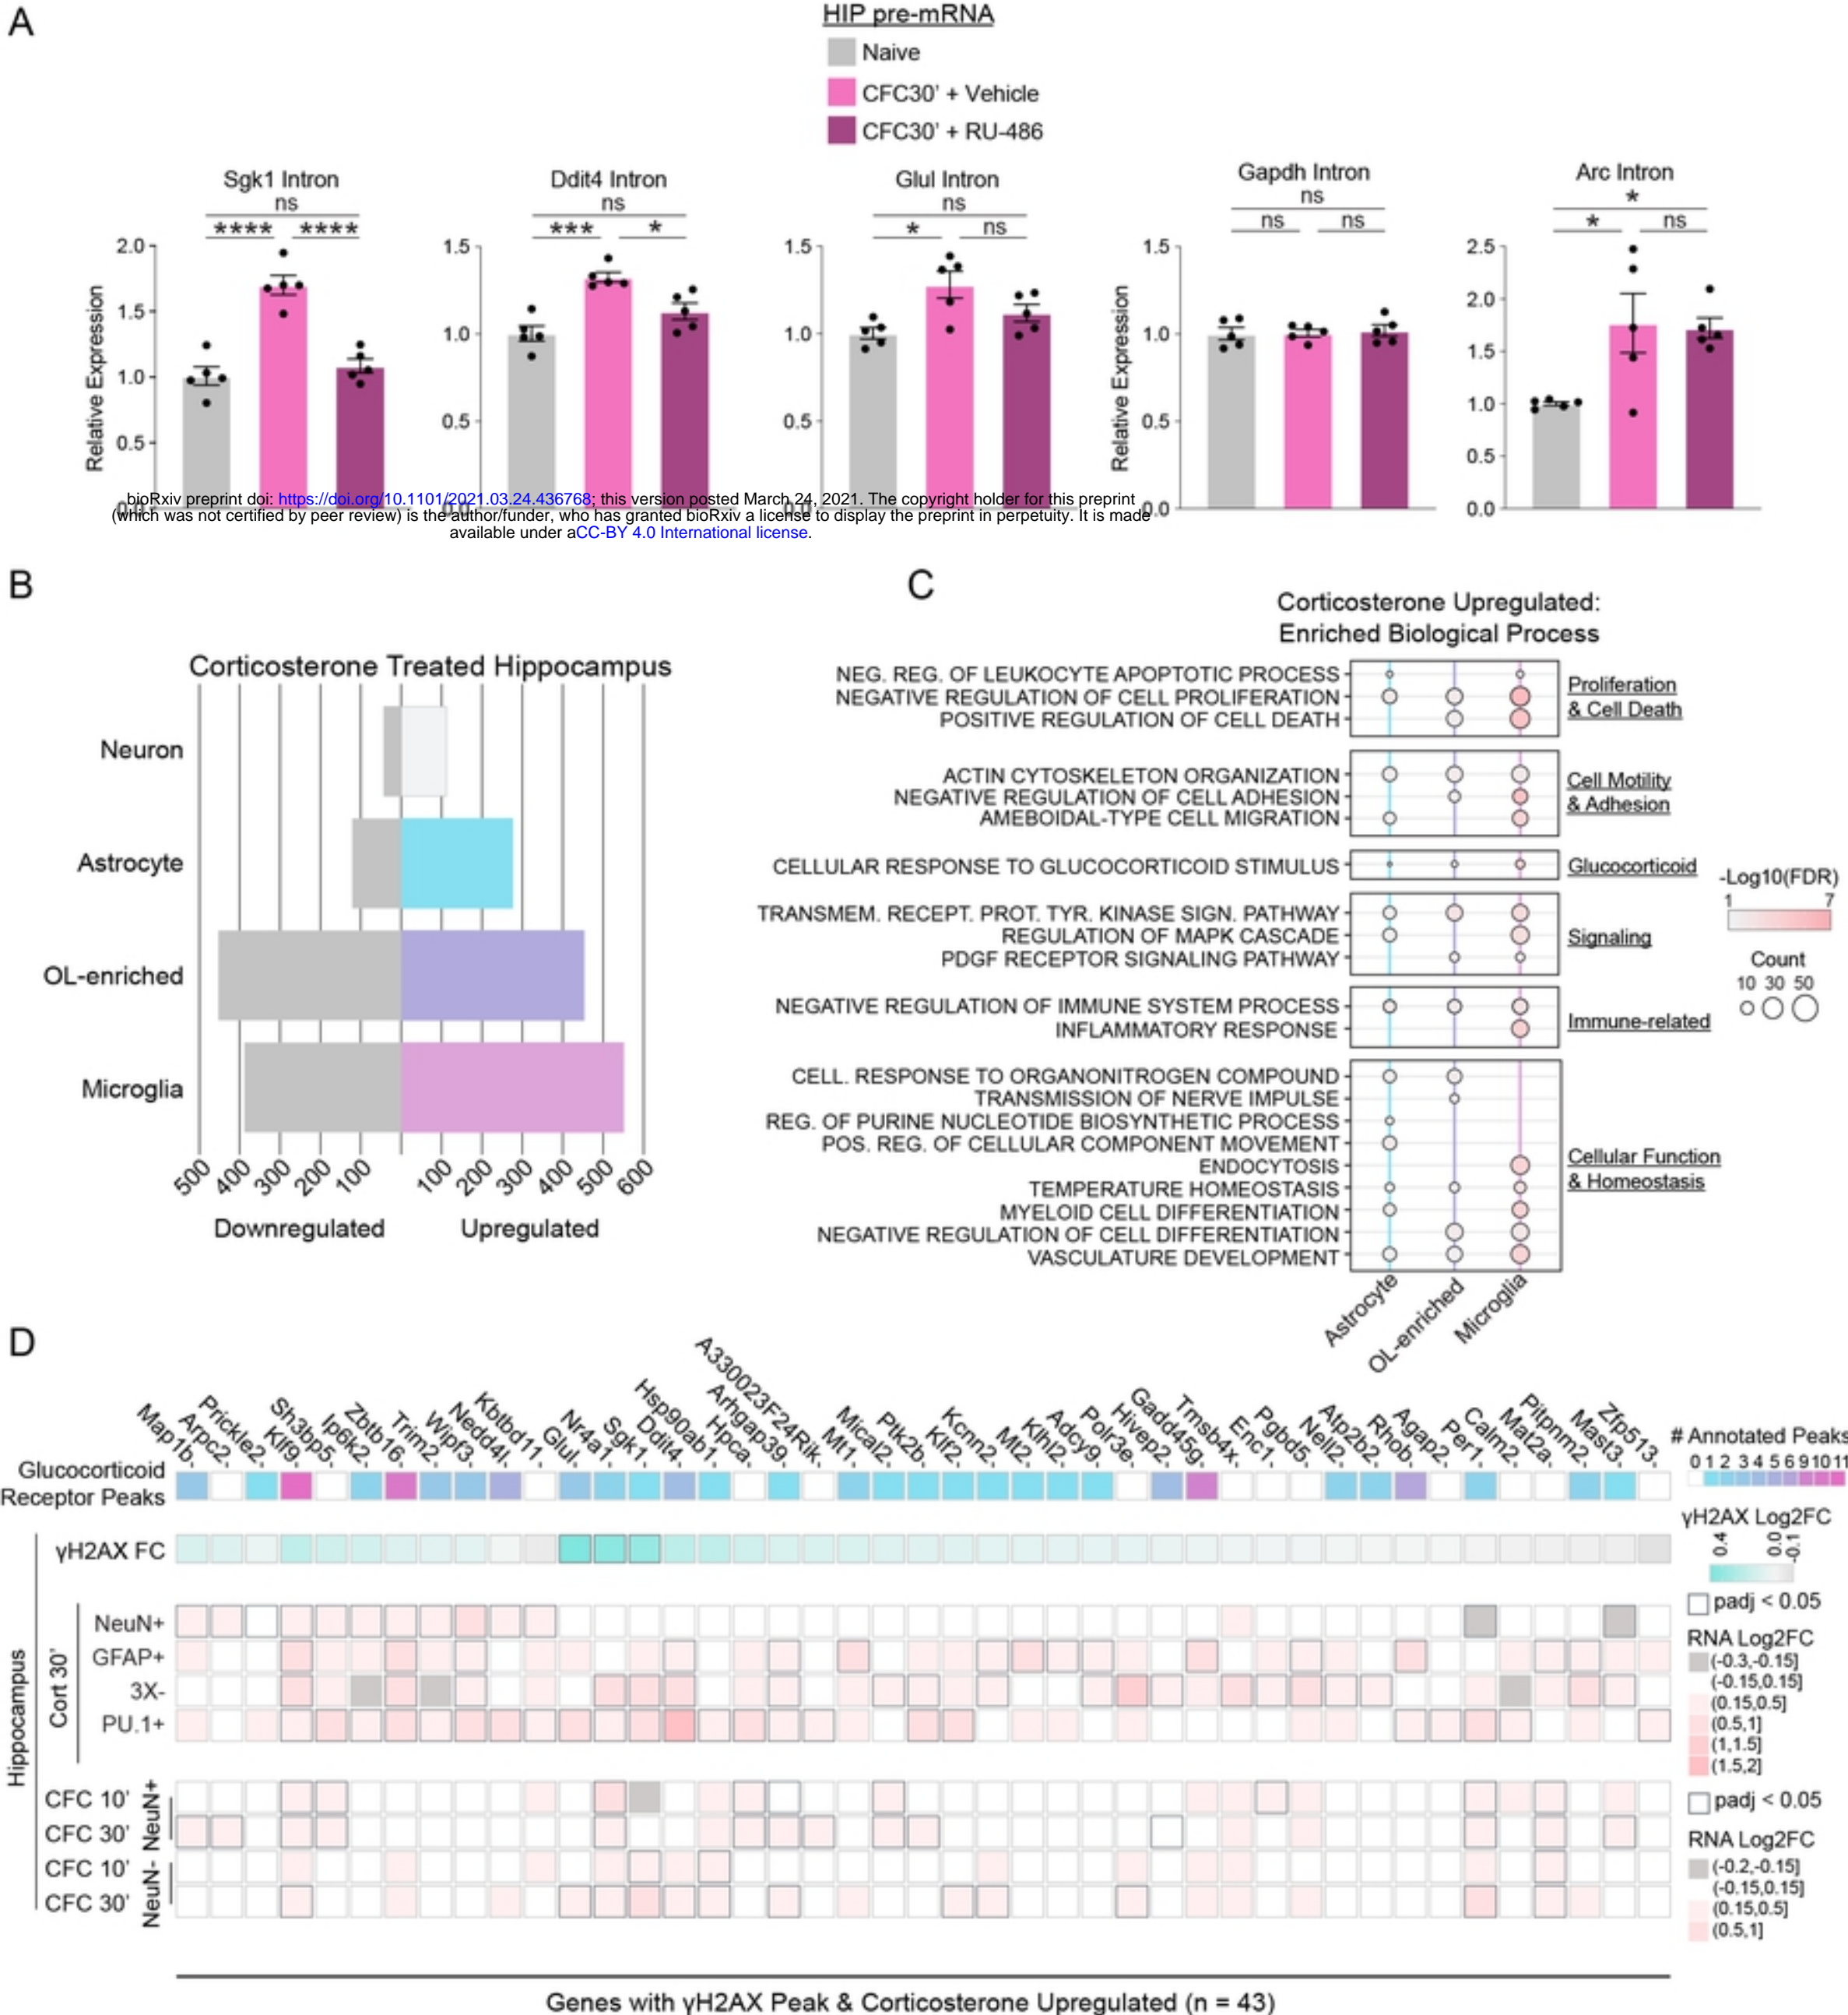

Figure 5
